# Supplementary material for: Genome-wide detection and characterization of positive selection in human populations
Source: Springer Nature journal article supplement (doi:10.1038/nature06250), 2007-10-01
Supplement: 41586_2007_BFnature06250_MOESM26_ESM.pdf [file 41586_2007_BFnature06250_MOESM26_ESM.pdf]

## Supplemental Methods

### LRH test, single SNP and windowed

#### *REHH*

To compare EHH values for a region across different groups of chromosomes, the LRH test first calculates a relative EHH (REHH)<sup>1</sup>. REHH is the ratio of EHH in one such group  $g$  to the average of EHH values in all other groups, with each group weighted by the probability of two chromosomes chosen from the combined data set belonging to  $g$ . More explicitly, if there are  $M$  chromosome groups, each with  $C_i$  chromosomes and an EHH value of  $EHH_i$ , REHH can be calculated by the formula

$$REHH_i = EHH_i / \left[ \frac{\sum_{\substack{j=1 \\ j \neq i}}^M \binom{C_j}{2} \times EHH_j}{\sum_{\substack{i=1 \\ j \neq i}}^M \binom{C_i}{2}} \right]$$

When only two groups are considered, REHH of group  $g$  is the ratio of EHH of  $g$  to that in the other group.

#### *LRH calculation*

We define the single-SNP LRH test with respect to a given core SNP, a given population, and a given direction (centromere distal or proximal). We focus on an area from the core SNP up to 1MB away from it in the specified direction. We pick a SNP  $X$  in this region such that its EHH with respect to the whole population is as close as possible to 0.04; if there is no SNP with such an EHH of between 0.03 and 0.05, the LRH test is skipped. Otherwise, we split the members of the population according to the core SNP allele they carry. For each allele, we note the pair [allele frequency, REHH at SNP  $X$ ].

We performed the single-SNP LRH test in both directions and for all SNPs in all populations in the HapMap Phase II dataset. However, we ignored SNPs whose minor allele had a frequency below 5%, because their low sample counts made their REHH scores unreliable. For alleles of comparable frequency, we found the resulting distribution of  $\ln(\text{REHH})$  scores (in both simulations and in the human genome) to be approximately normal. Thus, for each population, we split our results into 20 equally sized allele frequency bins, and normalized the associated  $\ln(\text{REHH})$  scores such that the  $\ln(\text{REHH})$  scores in every bin had zero mean and unit variance. We denoted these normalized  $\ln(\text{REHH})$  by "LRH scores". Outlying LRH scores are potentially indicative of selection<sup>1</sup>.

As in Voight et al.<sup>2</sup>, we can reduce our false positive rate (or, alternately, reduce our threshold for defining "outlying") by choosing to declare a region significant only when a

cluster of nearby SNPs has outlying LRH scores. In this windowed LRH test, we divide the genome into 100kb windows, each overlapping the next one by 50kb, and identify candidate regions for selection as those in which more than 0.1 fraction of SNPs within them have an LRH score above 3.92.

### **iHS test, single SNP and windowed**

Following Voight et al.<sup>2</sup>, we define the single-SNP iHS test with respect to a given core SNP and a given population. We perform the test only for biallelic SNPs whose minor allele frequency is above 5%. We split the members of the population according to the core SNP allele they carry. Let A denote the ancestral allele and D, the derived allele. Considering only the chromosomes carrying A, we calculate EHH scores between the core SNP and every biallelic SNP within 2.5MB. By linearly interpolating between successive biallelic SNPs, we integrate EHH with respect to genetic distance (cM). The integral extends the two points (centromere distal and proximal) at which EHH drops to exactly 0.05. If, however, EHH doesn't drop in both directions below 0.05 within 2.5MB of the core SNP, we skip the iHS test for that SNP. Otherwise, we denote the value of the integral by  $iHH_A$  (integrated haplotype homozygosity, ancestral). We follow an analogous procedure on the chromosomes carrying D to determine  $iHH_D$ . The unstandardised integrated haplotype score, or iHS, is defined as  $\ln(iHH_A / iHH_D)$ .

We calculated unstandardised iHSs for every SNP and population in the HapMap Phase II dataset. For SNPs whose derived allele frequency is comparable, the resulting distribution of unstandardised iHSs (in both simulations and in the human genome) has been shown to be approximately normal. Thus, for each population, we split our results into 20 equally sized allele frequency bins, and normalized the scores such that the set of scores in every bin has zero mean and unit variance. Due to the different population structure of chromosome X, we normalized its iHSs separately from those of the other chromosomes. We denote these normalized scores by simply "iHSs" (integrated haplotype scores). Outlying iHSs are potentially indicative of selection.

Information on the ancestral state of SNPs was provided by the International Haplotype Map Consortium. The ancestral allele was taken to be the chimpanzee base, where available, or the macaque base otherwise. If neither base was available, no ancestral state was inferred. For the ~7% of SNPs whose ancestral alleles were unavailable, we did not perform an iHS test. The genetic distances with respect to which we integrated were also those determined by the HapMap Project. We also chose to implement Voight et al's ad-hoc procedure to correct for large inter-SNP gaps in the data, although its effect was negligible in the high SNP-density Phase II data.

The iHSs reported by Voight are slightly different than those that would be obtained following the above procedure. In particular, their  $iHH_A$  is actually calculated by integrating the quantity  $(EHH - 0.05 + 1/N)$ , with N being the number of chromosomes carrying A (personal communication), and similarly for  $iHH_D$ . We have chosen to reproduce this peculiarity to compare iHS, LRH and XPop as fairly as possible, but found this correction to have a negligible effect on calculated iHSs.

Similarly to the windowed LRH test, we performed a windowed iHS test, where a 100kb window of the genome was identified if 0.3 fraction of iHSs had absolute value above 3.13.

### XP-EHH methods

We define the XP-EHH test with respect to two populations, A and B, a given core SNP, and a given direction (centromere distal or proximal). First, we consider all the SNPs for which there is data for both A and B that are up to 1MB from the given core SNP in the given direction. We pick a SNP X in this region such that its EHH with respect to all chromosomes in *both* populations is as close as possible to 0.04; if there is no SNP with such an EHH of between 0.03 and 0.05, the XP-EHH test is skipped. Next, we restrict our attention to the chromosomes in population A: we calculate EHH at all SNPs between the core SNP and X, and, similarly to the iHS test, integrate it within these bounds with respect to genetic distance. We call the result  $I_A$ . We proceed analogously with respect to population B, and call the result  $I_B$ . We define an XP-EHH logratio as  $\ln(I_A/I_B)$ .

For each population pair, we performed the XP-EHH test in both directions and for all SNPs in the HapMap Phase II. Empirically, the resulting distribution of XP-EHH logratios (in both simulations and in the human genome) is approximately normal. We note, however, that, in general, there was a small skew towards one population; we neglect this asymmetry when calculating significance scores. We normalize the XP-EHH logratio such that the set of all such logratios has zero mean and unit variance. We denote these normalized XP-EHH logratios by "XP-EHH scores". Outlying XP-EHH scores are potentially indicative of selection in a particular population. An XP-EHH score is directional: a positive score suggests selection is likely to have happened in population A, whereas a negative score suggests the same about population B. We include the region as a candidate if XP-EHH in one population pairwise comparison is above 5.1 or if XP-EHH in 2 population pairwise comparisons is above 4.34. The distribution of scores in the HapMap Phase 2 dataset, and corresponding percentiles are given in Figure S9.

### Simulations and Power Calculations

We simulated the evolution of a 1MB section (around 1.23 cM) of 120 chromosomes each of the three populations, European (CEU), Yoruba (YRI) and Chinese/Japanese (CHB+JPT), using a previously validated demographic model<sup>3</sup>. We simulated neutrally evolving loci and twenty scenarios of positive selection, in which a new allele experienced positive selective pressure starting 5ky, 10ky, 15ky, 20ky and 30ky, reaching in the present population 20%, 40%, 60%, 80% and 100% frequency. Positive selection was modelled separately in each of the three populations, using a deterministic allele frequency trajectory for the selected allele. The selected allele was omitted from the final data set (a conservative choice for calculating power), and the remaining SNPs were thinned randomly to match the HapMap Phase II data in density and allele frequency. For neutrality we produced 10,000 independent simulations. For the 10ky and 15ky

scenario, we produced 1000 independent simulations, and for the remaining scenarios, we produced 100 independent simulations.

We further studied the effect of bottlenecks on our tests by simulating recent bottlenecks with a range of intensity. For this purpose we employed a simplified version of the above demography: three populations, branched as before, but of constant size ( $N_e = 10,000$ ), with no migration or bottlenecks. A single bottleneck was then introduced into one population (the "European" population) 750 generations ago and 1 Mb segments were simulated. One thousand segments were generated for each of four intensities (as measured by the inbreeding coefficient): 0.0, 0.1, 0.2 and 0.3.

We analysed the simulation data using the LRH, iHS and XP-EHH tests described above. When normalizing scores, we calibrated the neutral simulation scores to have zero mean and unit variance, and then used the same parameters to normalize scores in all other simulated scenarios.

To compare the effectiveness of our individual tests, we estimated two properties with simulation: power and false positive rate (FPR). Power can be estimated by observing the fraction of simulations in which selection is detected, and depends on the strength of the selective pressure and on population structure. Conversely, FPR can be estimated by observing the fraction of neutral simulations where selection is erroneously detected. We measured FPR with respect to 10000 simulations of neutral evolution, and averaged the results over all three populations.

For LRH and iHS, power of each test has been extensively studied in previous papers<sup>1,2,4</sup>, although not directly compared. Comparing the tests on simulated data, we found that they have similar power to detect recent selection but with some differences. The iHS test has slightly lower power at low haplotype frequency, while the LRH test has slightly lower power at high frequency. This can be seen in applications to HapMap data (phase 1), where the iHS test misses the well-known cases of *HBB* and *CD36* and the LRH test misses the *SULT1C2* region<sup>2,5</sup>. While both tests are based on the concept of EHH, we observed that the false positives produced by the two tests in simulations tend not to overlap and thus that signals detected by both tests have a very low FPR.

Each XP-EHH test involves two populations, so we quantified its effectiveness slightly differently. When there are  $N$  simulations, there are actually  $2N$  results for XP-EHH tests between population A and one of the other two populations. Thus, we estimated XPop's power for detecting selection in A by observing the fraction of these results that showed signals for selection in A. We estimated XP-EHH's FPR by observing the fraction of pairwise XP-EHH tests between neutral simulations that showed signals of selection. When comparing multiple tests, we adjusted the test thresholds for claiming "significant results" so that all tests had equal FPRs.

$F_{ST} - F_{ST}$  was calculated for each pair of populations using the unbiased estimator of Weir and Cockerham<sup>6</sup>. For this study, individual marker  $F_{ST}$ s were calculated.

**Derived Allele Frequency** – Information on the ancestral state of SNPs was provided by the International Haplotype Map Consortium. The ancestral allele was taken to be the chimpanzee base, where available, or the macaque base otherwise. If neither base was available, no ancestral state was inferred.

The error rate in assigning the derived state using the chimpanzee genome for outgroup comparison is low (0.5%)<sup>7</sup>. Moreover, the iHS and XP-EHH tests, are designed to allow for the possibility of incorrect assignment of derived state. For localizing the signal of selection to particular polymorphisms, we used the derived state only as a guide, and still delineate highly differentiated alleles associated with the long haplotype.

## Sweep

We developed a Java program, Sweep, to perform EHH-like analyses (PV, BF, PCS, ESL unpublished, [www.broad.mit.edu/mpg/sweep](http://www.broad.mit.edu/mpg/sweep)). Sweep can import genotyping data in various formats, run various selection tests on it, and then visualize and export the results. At its core, Sweep acts as an EHH calculator, atop which the different selection tests are layered. For haplotype-based LRH tests, Sweep can also automatically identify haplotype blocks according to Gabriel et al's method. Sweep can be used to draw haplotype bifurcation diagrams for each allele in a haplotype. Moreover, Sweep can infer ancestral trees from modern-day haplotypes, using any available ancestral gene data to improve this inference. All visualizations made by Sweep can be exported to many bitmap (e.g., GIF, JPG, PNG) or vector (e.g., PDF) image formats.

As of this writing, we've coded the LRH, iHS and XP-EHH tests into Sweep, as well as provided an interactive way to adjust the tests' parameters and visualize the effects of these changes. To facilitate more automated analyses of larger data sets, like HapMap2, most of Sweep's functionality can be invoked through the command line.

Sweep has limited support for other recent selection tests (like  $F_{ST}$  and derived allele frequency), but has been designed to be easily extended. We hope Sweep may serve as a platform that allows other researchers to run existing selection tests on fertile new datasets, as well as a base on which to develop new tests for selection.

## Recombination rate variation between populations

Studies of the fine-scale recombination rate in the human genome have indicated that population variation in recombination rate may exist in some regions of the genome. These differences could affect our signals, as a long-haplotype might be generated by reduced recombination in one population rather than by a single chromosome rising in frequency. For our top regions detected by LRH and iHS, where the selected allele is still polymorphic in the population. We therefore use the other haplotypes in the population for comparison and to control for local or population variation in recombination rate.

For our top regions identified by the XP-EHH, we carefully examined the region surrounding each candidate, to rule out variation in recombination rate as a source of the

XP-EHH signal. For candidate regions where markers are still polymorphic in the population (like *LCT*) we use other non-selected alleles in the population to assess possible population variation in recombination rate. In these XP-EHH candidate regions, the non-selected allele shows similar EHH decay as those alleles in other populations suggesting that recombination rate differences are not the source of the signal. For many of the top XP-EHH signals (like *SLC24A5*) the selected allele has gone to 100% frequency, as have the nearby alleles. Recombination differences between populations is not a significant issue because the signal is driven by the lack of polymorphism, and only enhanced by the occurrence of long-haplotypes from other polymorphisms further away within the region.

### Copy Number Variation (CNV)

Several of the selected regions overlap with reported copy-number-variant (CNV) regions; while CNVs make appealing candidate loci for selection, current reports of CNV have insufficient spatial resolution for a true assessment of whether CNVs lie within the selected regions, and have generally lacked accurate sample-by-sample genotypes that could be used to assess whether copy number variants segregate on selected haplotypes or merely appear in the same general regions as selected loci. To assess whether signatures of selection at our strongest 22 candidates might be due to reported copy number variants in those regions, we reviewed underlying hybridization data for the HapMap samples from both a BAC arrayCGH platform<sup>8</sup> and a high-resolution oligonucleotide platform (Affymetrix GenomeWide 6.0, unpublished data). We report their coordinates in Table S11 along with the corresponding reference.

We further developed assays to assess whether CNV's could account for signatures of selection in the regions containing *EDAR* and *SLC24A5* (Figure S10). Copy number variation was previously reported in the *EDAR* region on BAC probes spanning 108.392-108.536 Mb<sup>9</sup> and 107.908-108.682 Mb<sup>8</sup>. Analysis of oligonucleotide array data showed that these observations were due to a 600-kb duplication variant spanning the 600kb region between segmentally duplicated sequence at 107.951-107.977 and 108.568-108.594 Mb (and therefore likely to have resulted from non-allelic homologous recombination between those sequences). The duplication allele was observed in two related YRI individuals (NA18870 and NA18872) but in no other HapMap samples, and is therefore unlikely to explain the signature of selection in this region. Overlapping the *SLC24A5* region, copy number variation has been reported by a single BAC probe spanning 46.296-46.451 Mb<sup>8</sup>; however, despite the fact that this region contained 60 probes on the oligonucleotide array, we observed no evidence for a CNV in any of the HapMap samples in this region, and suggest that the earlier report is a false discovery.

### Fraction of SNPs estimated to be genotyped in the HapMap and to be identified in dbSNP

We estimated these numbers using full sequence data from the ENCODE project, assuming it is representative of the true genome, and applied a correction for those SNPs likely missed by ENCODE (only important for very low frequency SNPs, < 5%).

The average number of SNPs in our 26 strongest candidates of selection was 809 with 195 – 1951 for the 95% confidence interval (CI). Given that 46% of SNPs with MAF > 5% are in HapMap, we thus estimated the typical region (95% CI) to have 424 – 4240 SNPs.

### Targeting sites of transcription factors and microRNAs

We predicted potential binding sites for all mammalian transcription factors deposited in the Transfac database (version 7.4). To identify matching instances of each factor, we calculate a log-odds score to evaluate how well a sequence matches the positional weight matrix ( $p_{ij}$ ) of the factor. The log-odds score is defined as  $LO = \sum_i \log_2(p_{i, j(i)} / b_{j(i)})$  where  $j(i)$  is the nucleotide at position  $i$  of the sequence, and  $b_j$  is the background frequency of the nucleotide  $j$ . We calculated the mean ( $\mu$ ) and variance ( $\sigma^2$ ) of the log-odds score over a set of control sequences. An instance is called a matching instance if its log-odds score is above the threshold:  $\mu + 4.5\sigma$ . Upon identifying a matching motif instance in human, we determined if the instance is conserved in orthologous regions of other mammals. We proceeded by first extracting aligned sequences in the whole-genome alignment of 12 mammals (from UCSC Genome website). We then determined those species in which the corresponding aligned sequence also contains a matching instance. We defined an instance as *conserved* if the evolutionary tree connecting all species with a matching instance has a total branch length (measured in rate of mutations per nucleotide) greater than 0.85. (For reference, the total branch length connecting human, mouse, rat, and dog is 0.76).

We also predicted the targeting sites of microRNAs in 3'-UTRs of genes using the method as described in Xie et al<sup>10</sup>.

### Expression analysis

We obtained expression intensities of 44,000 probes representing the majority of the human gene complement for the HapMap individuals from the Wellcome Trust Sanger Institute's website<sup>11</sup>. We normalized the four sets of data from each individual by fitting a nested linear model to account for the two levels of technical duplication (in vitro transcription and chip hybridization) performed by the data generators, using the provided detection probability as a weighting. Of 289 UCSC known genes (*H. sapiens* build 17) in our regions, 109 were represented on the expression platform and had median detection probabilities >0.95, giving us high confidence that they were reliably detected. We used intensities from each of these genes as quantitative traits in a standard association test to the SNPs within the gene's region of residence, estimating significance by permutation (Purcell S, Neale B, Daly MJ, Sham PC, submitted)

### Alignment of human SLC24 amino acid sequences

Amino acid sequences of the six SLC24 proteins were obtained from the Uniprot protein database<sup>12</sup>, aligned with ClustalW<sup>13</sup> and the alignment formatted with Boxshade ([http://www.ch.embnet.org/software/BOX\\_form.html](http://www.ch.embnet.org/software/BOX_form.html)). Transmembrane Domain

predictions were performed using TMHMM<sup>14</sup>.

### Species alignment

We aligned the amino acid sequences of our top candidates to orthologous sequences from 17 mammals and annotated features of interest including: fixed differences, exon numbers, conserved regions, nonsynonymous SNPs, and functional domains. We obtained human amino acid sequences and exon positions from the UCSC Genome Browser (<http://genome.ucsc.edu/>). We then used another genome browser, Alpheus (<http://www.broad.mit.edu/~mclump/alpheus/>), to align the human amino acid sequences to their orthologs. We designated amino acids as being encoded by conserved genomic regions based on the phastConsElements17way dataset (hg17) from the UCSC Genome Browser. We acquired a table of SNPs (snp125 hg17) for each gene using the UCSC Genome Browser. Finally, we annotated functional domains and other protein features based on designations in the UniProt protein database (<http://www.pir.uniprot.org/>).

### Conservation Graphs

We made graphs of conservation versus nucleotide position for 10kb regions surrounding our candidate SNPs in each of the following genes: EDAR, EDA2R, SLC24A5, and SLC45A2. We also marked interesting genomic features in these regions including: exons, SNPs, and protein domains. We obtained the conservation scores from the PhastCons17way dataset (hg17) from the UCSC Genome Browser (<http://genome.ucsc.edu/>). We also obtained exon and SNP positions from the UCSC Genome Browser. Finally, we marked nucleotides coding for protein domains and other protein features based on amino acid designations in the UniProt protein database<sup>12</sup>.

- 1 P. C. Sabeti, D. E. Reich, J. M. Higgins et al., *Nature* **419** (6909), 832 (2002).
- 2 B. F. Voight, S. Kudaravalli, X. Wen et al., *PLoS Biol* **4** (3), e72 (2006).
- 3 S. F. Schaffner, C. Foo, S. Gabriel et al., *Genome Res* **15** (11), 1576 (2005).
- 4 P. C. Sabeti, S. F. Schaffner, B. Fry et al., *Science* **312** (5780), 1614 (2006).
- 5 *Nature* **437** (7063), 1299 (2005).
- 6 B. S. Weir and C. C. Cockerham, *Evolution* **38**, 1358 (1984).
- 7 *Nature* **437** (7055), 69 (2005).
- 8 R. Redon, S. Ishikawa, K. R. Fitch et al., *Nature* **444** (7118), 444 (2006).
- 9 D. P. Locke, A. J. Sharp, S. A. McCarroll et al., *Am J Hum Genet* **79** (2), 275 (2006).
- 10 X. Xie, J. Lu, E. J. Kulbokas et al., *Nature* **434** (7031), 338 (2005).
- 11 B. E. Stranger, M. S. Forrest, M. Dunning et al., *Science* **315** (5813), 848 (2007).
- 12 *Nucleic acids research* **35** (Database issue), D193 (2007).
- 13 R. Chenna, H. Sugawara, T. Koike et al., *Nucleic acids research* **31** (13), 3497 (2003).
- 14 A. Krogh, B. Larsson, G. von Heijne et al., *Journal of molecular biology* **305** (3), 567 (2001).

## Supplemental Figures

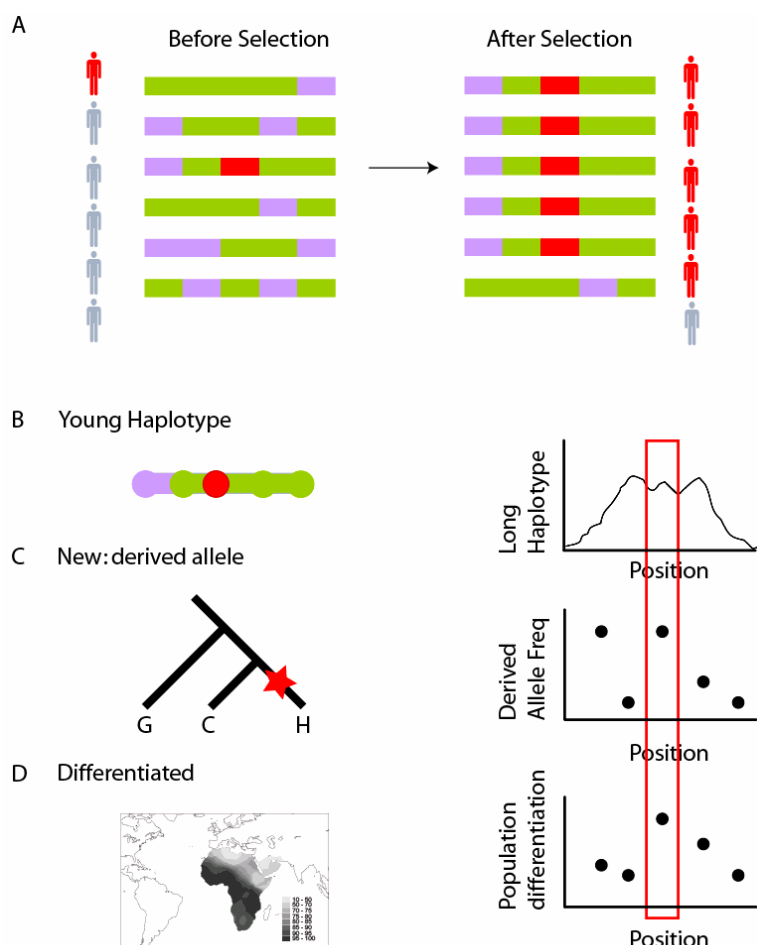

**Figure S1 Localizing signal in a candidate region for natural selection, identified by long haplotypes.** A). We show a cartoon of 5 polymorphisms in a candidate region rising to high frequency along with a positively selected (red) allele. Derived alleles are shown in purple. B) Long-haplotype tests identify regions where variants have risen to high frequency so rapidly that recombination has not had time to break down links between nearby variants. Many variants within the region, will thus share the signal of long-haplotype, as they are all reciprocally linked to each other. C) Given that long-haplotype methods are designed to identify young alleles, we expect the selected allele to be a derived allele on the long-haplotype identified. D) Given that recent selection is often a local phenomenon, we expect the selected allele to be differentiated between populations with and without signals of selection. Only a subset SNPs in a candidate region will share these characteristics, and an even smaller subset will be functional.

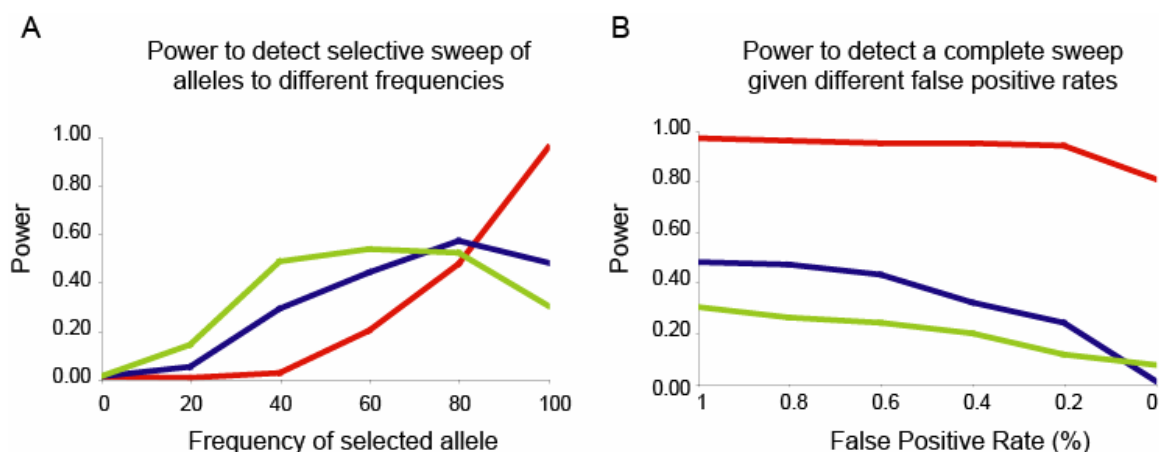

**Figure S2 Power Calculations.** (A) The estimated power, based on simulations, for the LRH test (green), the IHS test (blue), and the XP-EHH test (red). The power for simulations is given where the selected allele originated 15kya in Europe, given a 1% false positive rate (FPR) in neutral simulations (Methods). (B) The estimated power to detect a complete sweep (100% frequency of selected allele) for the 3 tests as the FPR for neutral simulation is decreased from 1% to 0%. See Table S1-6 for results for other time frames, populations, demographies, and thresholds.

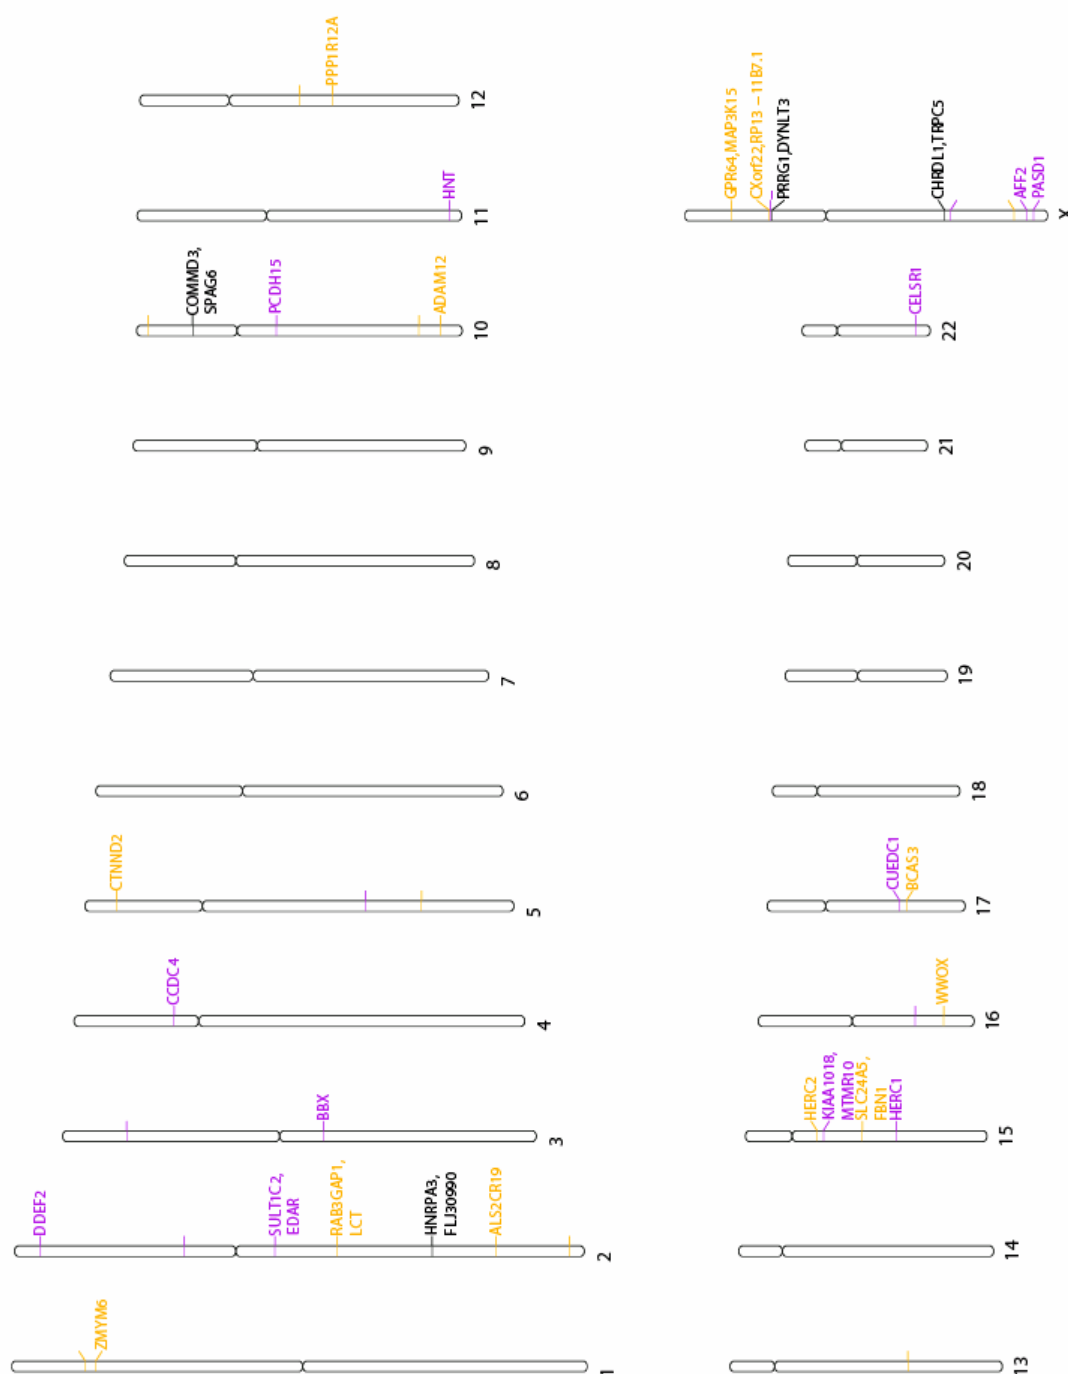

**Figure S3: Top 43 XP-EHH candidates.** The regions were identified given an FPR in simulations of 0.4% per 1MB region. The regions are given along with example genes in the region. The color indicates the population where selection was identified (orange-CEU, purple-JPT+CHB, black-CEU&JPT+CHB). Top candidates for the LRH and iHS tests are given in the HapMap Phase 2 paper, a companion paper in this issue.

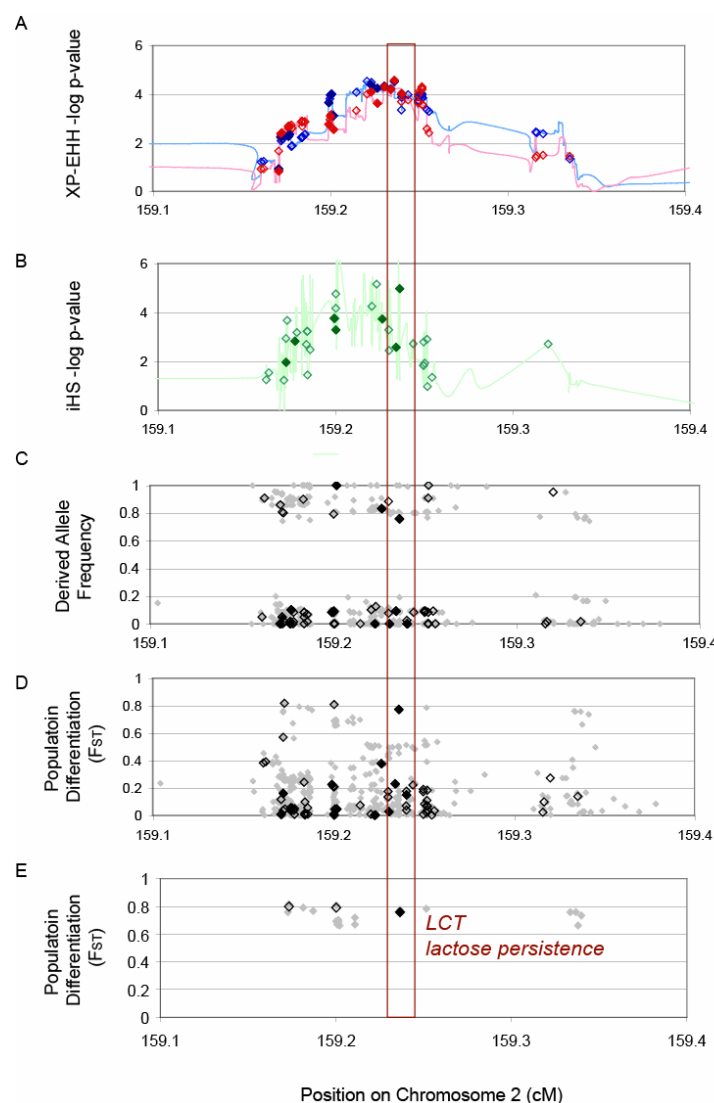

**Figure S4 *LCT* region of positive selection.** We found strong evidence for selection based on XP-EHH, LRH, and iHS tests at the locus near *LCT* (A) We examined XP-EHH between CEU and JPT+CHB (blue), CEU and YRI (red), and YRI and JPT+CHB (gray), and found strong evidence of recent selection in CEU. (B) We also identify strong evidence based on the iHS tests. We classified potential functional SNPs into lower probability (bordered diamonds) and high probability (filled diamonds). We examined SNPs for our 3 criteria for a target of selection based on (B) the frequency of derived alleles, (C) differences between populations and (D) differences between populations for high frequency derived alleles less than 20% in non-selected populations. The lactose persistence allele at *LCT* is one of 24 polymorphisms that are high frequency derived and only common in CEU.

A

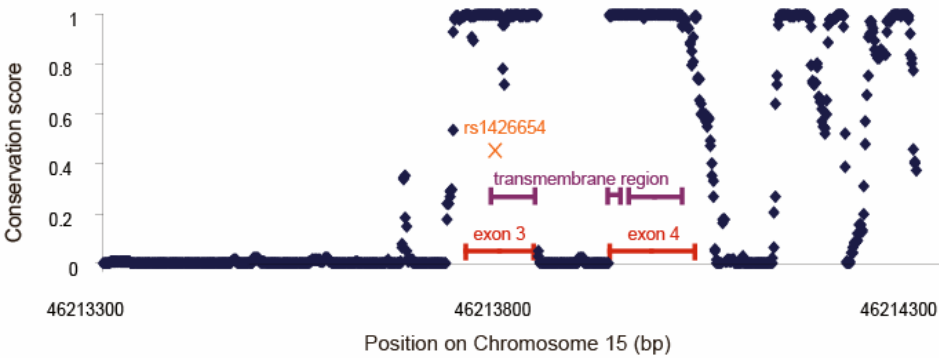

B

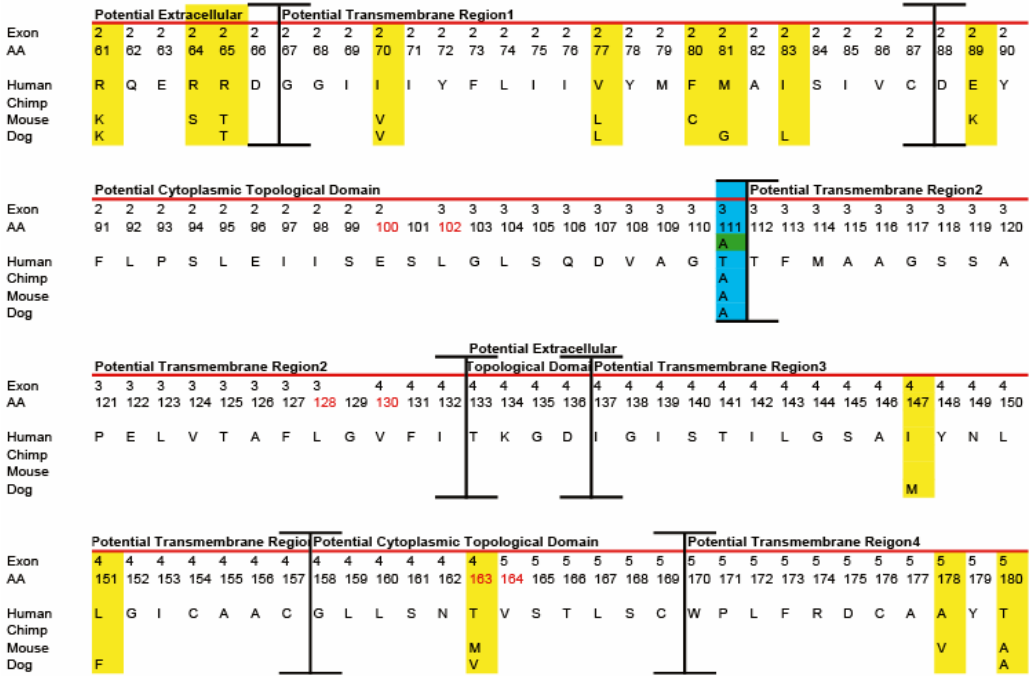

**Figure S5 *SLC24A5* Ala111Thr in highly conserved transmembrane region.** A) Conservation score (blue diamonds) around exon 3 of *SLC24A5* on Chromosome 3. The Ala111Thr polymorphism (rs1426654) lies within a highly conserved potential transmembrane region in exon 3. B) A closer view of the amino acid sequence in *SLC24A5*. The exon and amino acid number is shown at the top. Red lines indicate high conservation based on PhastCon (Methods). Amino acids with substitutions between the 4 species are highlighted in yellow. Ala111Thr is indicated in blue.

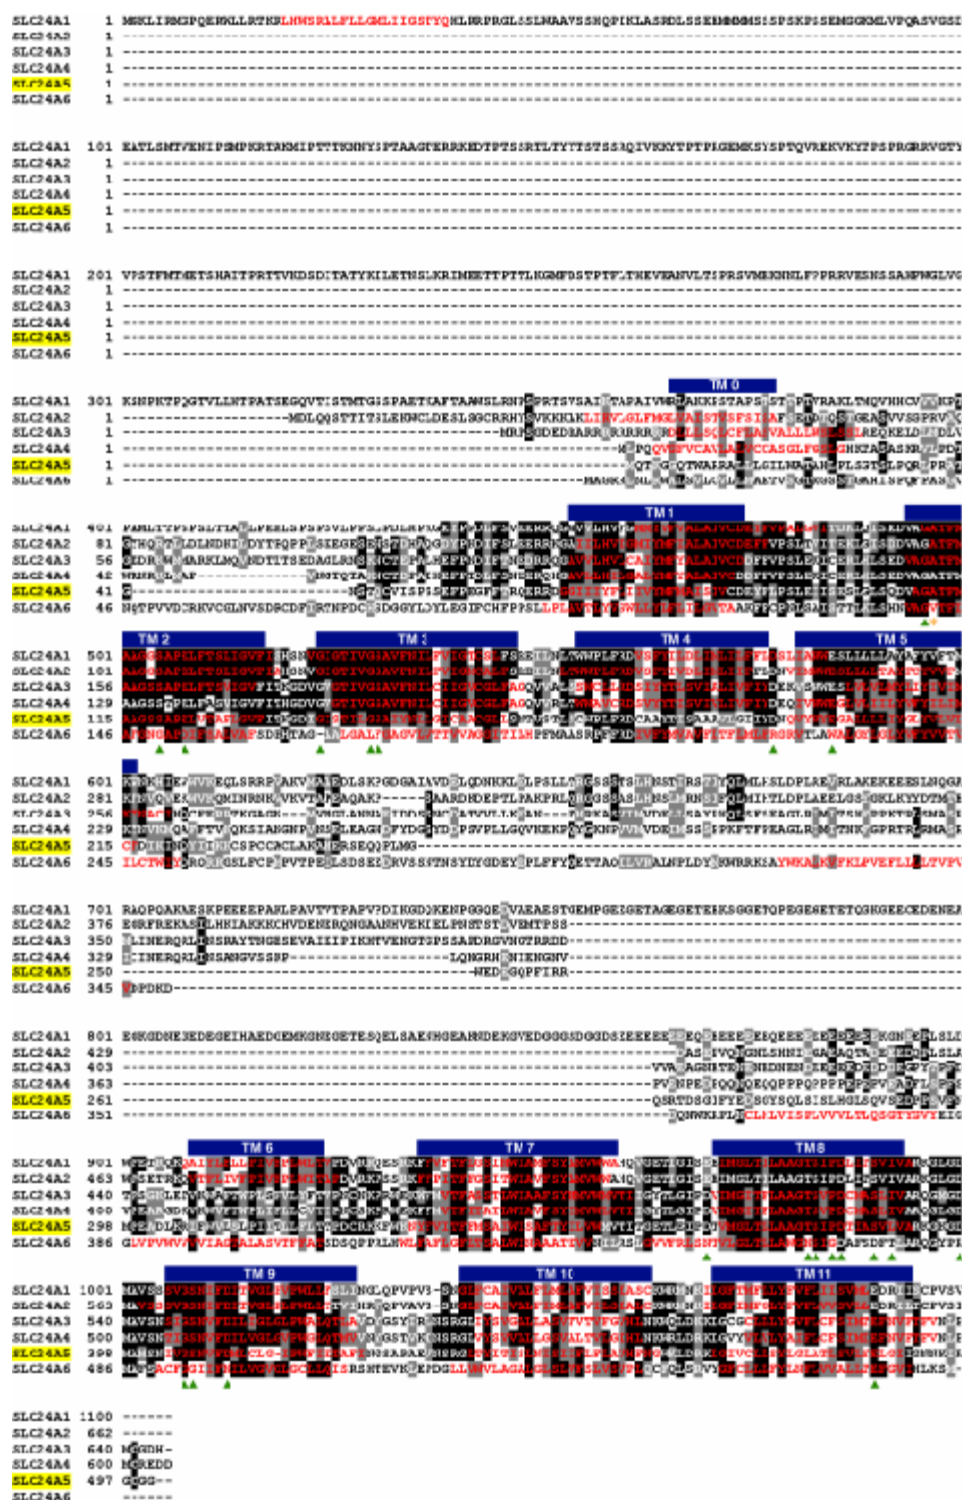

**Figure S6 Annotated Alignment of human SLC24 amino acid sequences.** Legend on next page.

**Figure S6 Annotated Alignment of human SLC24 amino acid sequences.** Alignment of the amino acid sequences of the six human SLC24, K<sup>+</sup>-dependent Na<sup>+</sup>/Ca<sup>2+</sup> exchanger family members. Aligned residues identical or similar in greater than three sequences are shadowed in black and grey, respectively. Residues predicted to be in transmembrane regions (TMs) are red. Blue boxes above the alignment represent consensus TM regions in which three or more residues are predicted to be in a TM region. The polymorphic SLC24A5 residue, A111, encoded by candidate SNP rs1426654 is marked by an orange asterisk. Green triangles indicate mutations that lead to a >70% decrease in transporter activity, as part of a scanning mutagenesis study of residues 172-212 and 536-575 in SLC24A2<sup>1</sup>. Notably the G176A mutation of SLC24A2, corresponding to G110 in SLC24A5, leads to one of the most severe reductions in SLC24A2 activity, >85%, and the A177S mutation, corresponding to A111 in SLC24A5, leads to a ~40% reduction in SLC24A2 transporter activity<sup>1</sup>.

- 1 R. J. Winkfein, R. T. Szerencsei, T. G. Kinjo et al., *Biochemistry* 42 (2), 543 (2003).

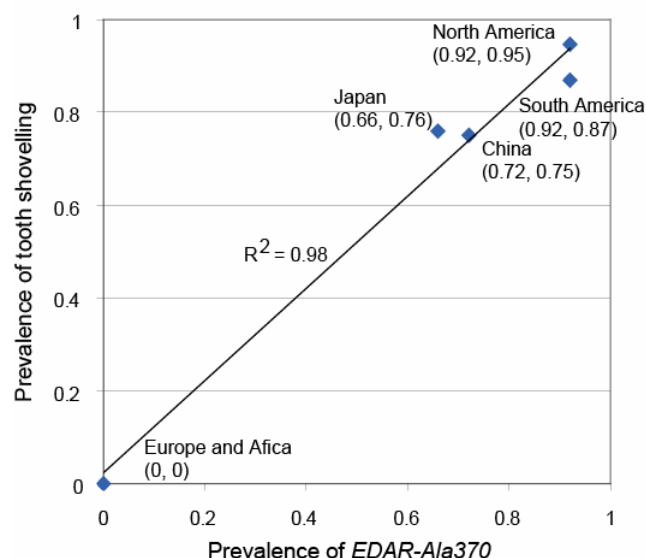

**Figure S7 Prevalence of tooth shovelling and *EDAR-Ala370* allele in 4 Sinodont populations.** A great deal is known from the anthropological record about the physical traits regulated by the EDA pathway, particular teeth and to less extent hair, in human populations. There are two distinct tooth patterns common to Asia<sup>1</sup>, defined by a phenomenon called "tooth shoveling," in which the back surface of the upper incisors has a "shovel" appearance.<sup>1</sup> Shoveling consists of a "combination of a concave lingual surface and elevated marginal ridges enclosing a central fossa in the upper central incisor teeth."<sup>2</sup> The pattern is particular among the Sinodonts, a population that evolved from the Sundadonts (the original inhabitants of Asia) as they moved north and inland into Asia. Sinodonts evolved in present-day China, and they also migrated from the Asian mainland into Japan around 2,000 years ago. Native American populations came from Asia in at least two waves of migration,<sup>3</sup> and may be in part populated by Sinodonts. High tooth shoveling frequencies have accordingly been reported in Sinodont populations in China-Mongolia, Japan, NE Siberia-Amur, Aleut-Eskimo, Greater NW Coast, North America, and South America. We had *EDAR-Ala370* allele frequency data for four Sinodont populations, where tooth shovelling frequencies have been determined and examined the correlation. There are many limitations to this analysis. Only 4 populations (as well as Europe and Africa) frequencies are known. Moreover the samples are not the same and may reflect different subpopulations.

1. Turner, C. G., 2nd. Teeth and prehistory in Asia. *Sci Am* 260, 88-91, 94-6 (1989).
2. Hsu, J. W. et al. Ethnic dental analysis of shovel and Carabelli's traits in a Chinese population. *Aust Dent J* 44, 40-5 (1999).
3. Karafet, T. M. et al. Ancestral Asian source(s) of new world Y-chromosome founder haplotypes. *Am J Hum Genet* 64, 817-31 (1999).

A

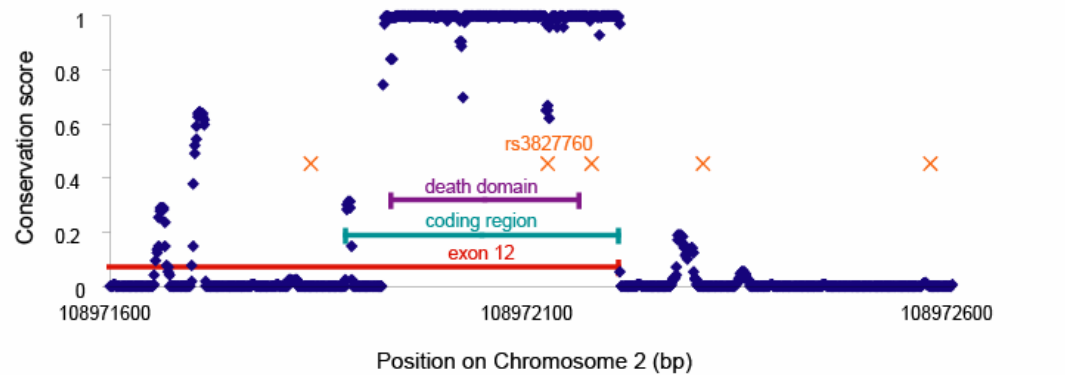

B

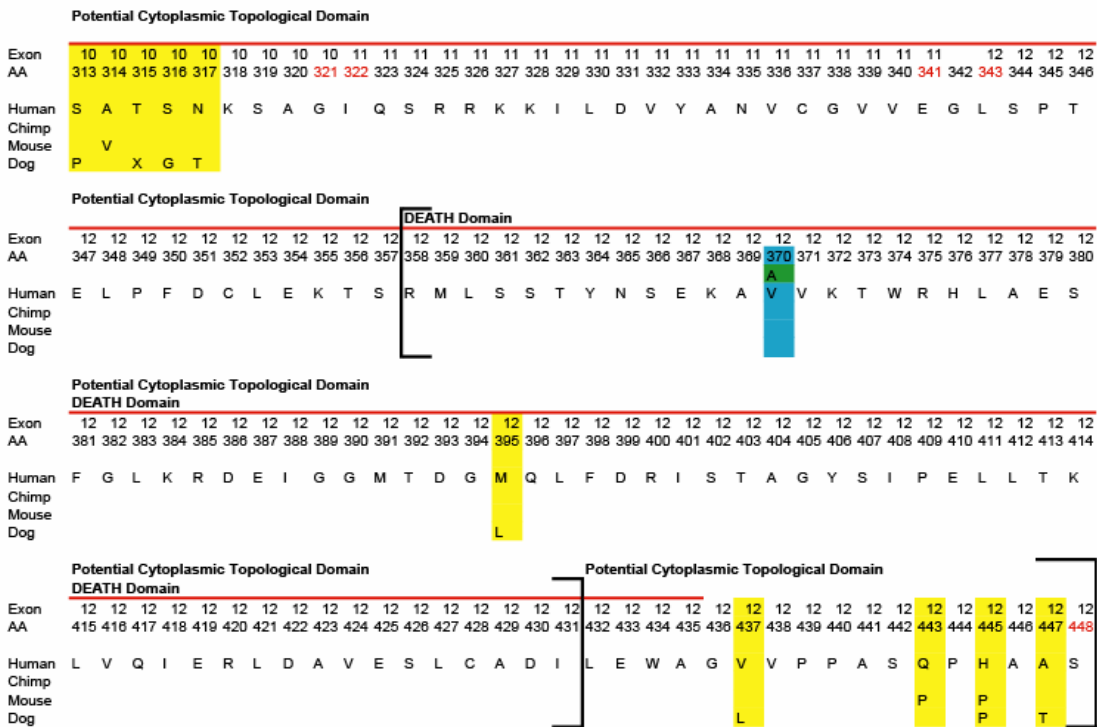

**Figure S8 *EDAR* Val370Ala in highly conserved death domain.** A) Conservation score (blue diamonds) around Exon 12 of *EDAR* on Chromosome 2. The Val370Ala polymorphism (rs3827760) lies within the highly conserved death domain in the coding portion of exon 12. B) A closer view of the amino acid sequence in *EDAR*. The exon and amino acid number is shown at the top. Red lines indicate high conservation based on PhastCon (Methods). Amino acids with substitutions between the 4 species are highlighted in yellow. Val370Ala is indicated in blue.

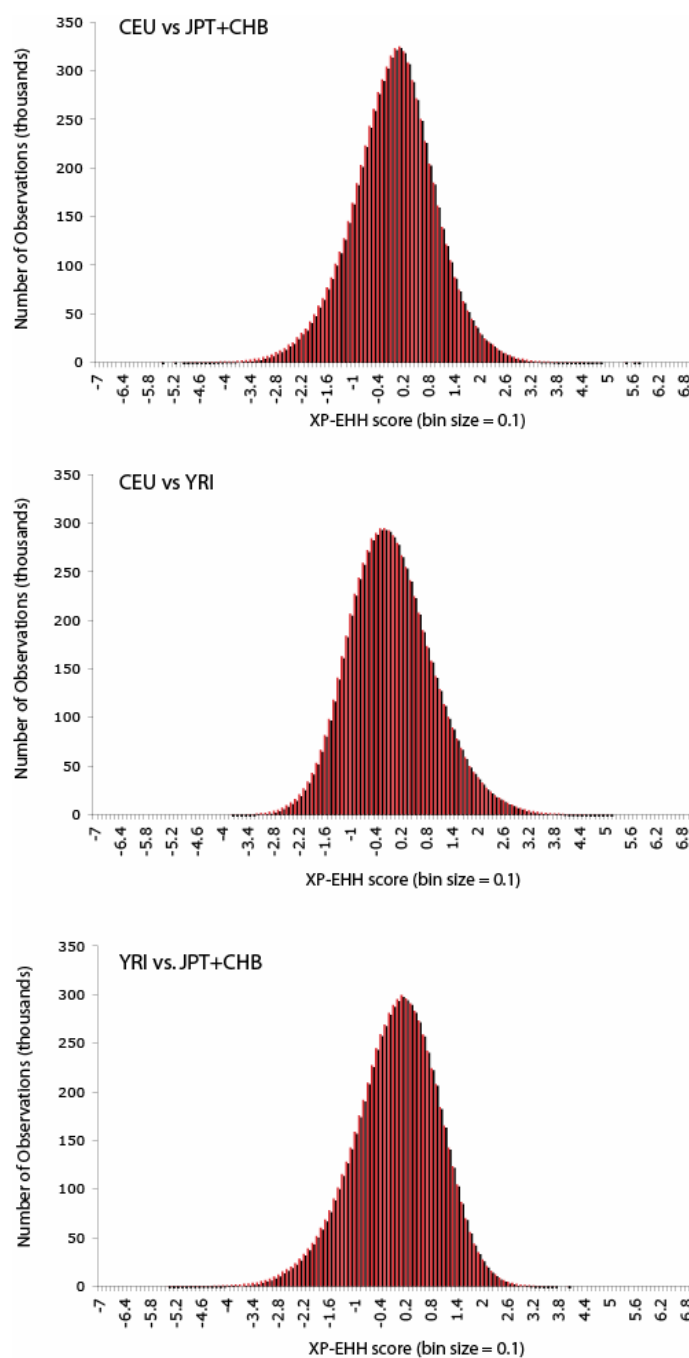

**Figure S9 Distribution of XP-EHH scores for each population comparison in the from the HapMap Phase 2 dataset.** For CEU vs. CHB+JPT, a score of 4.34 is in the 99.943 percentile, and 5.1 is in the 99.988 percentile. For CEU vs YRI, a score of 4.34 is in the 99.970 percentile, and 5.1 is in the 99.998 percentile. For YRI vs JPT+CHB, a score of 4.34 is in the 99.942 percentile, and 5.1 is in the 99.987 percentile.

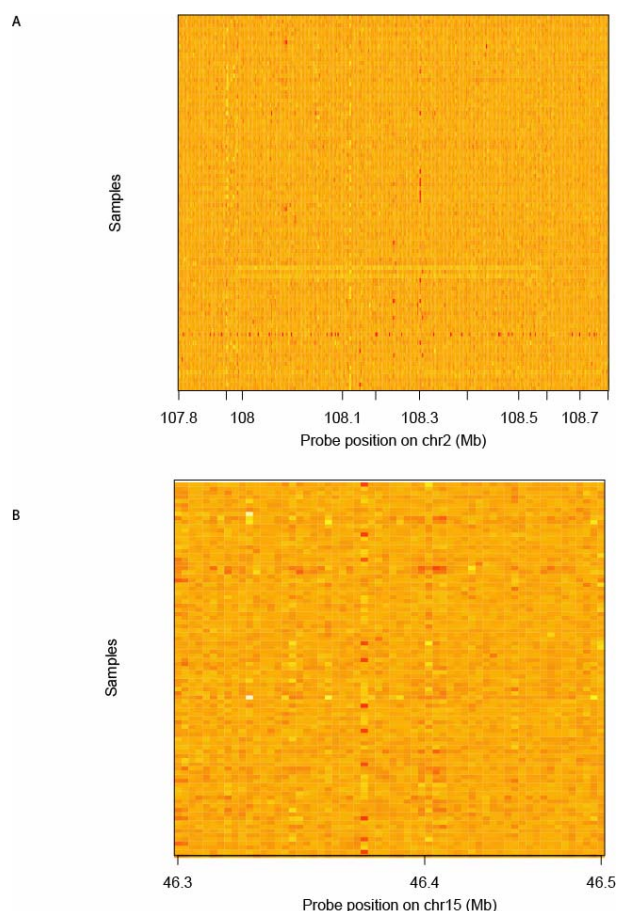

**Figure S10 Analysis of oligonucleotide array data to assess CNVs in the candidate regions containing *EDAR* and *SLC24A5*.** A) CNV was previously reported overlapping the *EDAR* region on BAC probes spanning 108.392-108.536 Mb<sup>1</sup> and 107.908-108.682 Mb<sup>37</sup>. Analysis of oligonucleotide array data showed that these observations were due to a 600-kb duplication variant spanning the 600kb region between segmentally duplicated sequence at 107.951-107.977 and 108.568-108.594 Mb (and therefore likely to have resulted from non-allelic homologous recombination between those sequences). The duplication allele was observed in two related YRI individuals (NA18870 and NA18872) but in no other HapMap samples, and is therefore unlikely to explain the signature of selection in this region. B) CNV was previously reported overlapping the *SLC24A5* region, by a single BAC probe spanning 46.296-46.451 Mb<sup>2</sup>; however, despite the fact that this region contained 60 probes on the oligonucleotide array, we observed no evidence for a CNV in any of the HapMap samples in this region, and suggest that the earlier report is a false discovery.

1 D. P. Locke, A. J. Sharp, S. A. McCarroll et al., *Am J Hum Genet* 79 (2), 275 (2006).

2 R. Redon, S. Ishikawa, K. R. Fitch et al., *Nature* 444 (7118), 444 (2006).

## Supplemental Tables

**Table S1 Power of the LRH test to detect a selected allele that emerged at 5 different points in time, and rose to 5 different frequencies in 3 different populations, given a 1% false positive rate (FPR).**

| LRH (1% FPR)  |      |       |       |       |       |
|---------------|------|-------|-------|-------|-------|
| Allele Freq   | 5kya | 10kya | 15kya | 20kya | 30kya |
| <i>Europe</i> |      |       |       |       |       |
| 20            | 0.16 | 0.15  | 0.14  | 0.17  | 0.15  |
| 40            | 0.69 | 0.53  | 0.48  | 0.43  | 0.33  |
| 60            | 0.79 | 0.66  | 0.54  | 0.64  | 0.54  |
| 80            | 0.78 | 0.59  | 0.52  | 0.46  | 0.43  |
| 100           | 0.53 | 0.32  | 0.30  | 0.28  | 0.20  |
| <i>Asia</i>   |      |       |       |       |       |
| 20            | 0.16 | 0.22  | 0.09  | 0.14  | 0.10  |
| 40            | 0.58 | 0.51  | 0.35  | 0.48  | 0.50  |
| 60            | 0.76 | 0.62  | 0.53  | 0.51  | 0.46  |
| 80            | 0.80 | 0.52  | 0.48  | 0.43  | 0.40  |
| 100           | 0.53 | 0.40  | 0.27  | 0.21  | 0.24  |
| <i>Africa</i> |      |       |       |       |       |
| 20            | 0.44 | 0.16  | 0.15  | 0.15  | 0.15  |
| 40            | 0.94 | 0.71  | 0.66  | 0.49  | 0.50  |
| 60            | 0.98 | 0.87  | 0.73  | 0.75  | 0.73  |
| 80            | 1.00 | 0.98  | 0.76  | 0.71  | 0.72  |
| 100           | 0.65 | 0.86  | 0.79  | 0.75  | 0.69  |

**Table S2 Power of the iHS test to detect a selected allele that emerged at 5 different points in time, and rose to 5 different frequencies in 3 different populations, given a 1% FPR.**

| iHS (1% FPR)  |      |       |       |       |       |
|---------------|------|-------|-------|-------|-------|
| Allele Freq   | 5kya | 10kya | 15kya | 20kya | 30kya |
| <i>Europe</i> |      |       |       |       |       |
| 20            | 0.10 | 0.12  | 0.05  | 0.07  | 0.12  |
| 40            | 0.55 | 0.38  | 0.29  | 0.28  | 0.38  |
| 60            | 0.87 | 0.7   | 0.44  | 0.51  | 0.46  |
| 80            | 1.00 | 0.87  | 0.57  | 0.39  | 0.54  |
| 100           | 0.59 | 0.65  | 0.48  | 0.43  | 0.38  |
| <i>Asia</i>   |      |       |       |       |       |
| 20            | 0.04 | 0.16  | 0.04  | 0.02  | 0.11  |
| 40            | 0.48 | 0.5   | 0.28  | 0.32  | 0.29  |
| 60            | 0.84 | 0.72  | 0.48  | 0.43  | 0.35  |
| 80            | 0.97 | 0.79  | 0.54  | 0.40  | 0.49  |
| 100           | 0.52 | 0.66  | 0.50  | 0.41  | 0.23  |
| <i>Africa</i> |      |       |       |       |       |
| 20            | 0.33 | 0.12  | 0.06  | 0.12  | 0.14  |
| 40            | 0.88 | 0.7   | 0.52  | 0.40  | 0.53  |
| 60            | 0.94 | 0.88  | 0.60  | 0.67  | 0.69  |
| 80            | 1.00 | 0.95  | 0.78  | 0.68  | 0.74  |
| 100           | 0.78 | 0.92  | 0.89  | 0.89  | 0.81  |

**Table S3 Power of the XP-EHH test to detect a selected allele that emerged at 5 different points in time, and rose to 5 different frequencies in 3 different populations, given a 1% FPR.**

| <b>XP-EHH (1% FPR)</b> |             |              |              |              |              |
|------------------------|-------------|--------------|--------------|--------------|--------------|
| <b>Allele Freq</b>     | <b>5kya</b> | <b>10kya</b> | <b>15kya</b> | <b>20kya</b> | <b>30kya</b> |
| <i>Europe</i>          |             |              |              |              |              |
| 20                     | 0.02        | 0.00         | 0.01         | 0.01         | 0            |
| 40                     | 0.21        | 0.11         | 0.03         | 0.03         | 0.01         |
| 60                     | 0.80        | 0.35         | 0.20         | 0.21         | 0.09         |
| 80                     | 0.96        | 0.68         | 0.48         | 0.30         | 0.27         |
| 100                    | 1.00        | 1.00         | 0.95         | 0.81         | 0.53         |
| <i>Asia</i>            |             |              |              |              |              |
| 20                     | 0.00        | 0.00         | 0.01         | 0.00         | 0            |
| 40                     | 0.08        | 0.04         | 0.04         | 0.01         | 0.01         |
| 60                     | 0.67        | 0.29         | 0.23         | 0.12         | 0.05         |
| 80                     | 0.96        | 0.58         | 0.38         | 0.19         | 0.2          |
| 100                    | 0.99        | 1.00         | 0.89         | 0.76         | 0.4          |
| <i>Africa</i>          |             |              |              |              |              |
| 20                     | 0.00        | 0.00         | 0.03         | 0.00         | 0.02         |
| 40                     | 0.08        | 0.02         | 0.07         | 0.02         | 0.03         |
| 60                     | 0.68        | 0.31         | 0.17         | 0.14         | 0.16         |
| 80                     | 0.96        | 0.74         | 0.39         | 0.27         | 0.35         |
| 100                    | 1.00        | 1.00         | 0.97         | 0.89         | 0.62         |

**Table S4 Power of the LRH, iHS, and XP-EHH tests to detect a selected allele that emerged at 15 thousand years ago (15kya) and rose to 100% frequency in 3 different populations for 7 different FPR.**

| 15 kya        |                         |        |      |        |
|---------------|-------------------------|--------|------|--------|
| FPR           | Parameters              | Europe | Asia | Africa |
| <i>LRH</i>    |                         |        |      |        |
| 2             | 10% LRH in 100kb >3.5   | 0.44   | 0.42 | 0.84   |
| 1             | 10% LRH in 100kb >3.85  | 0.30   | 0.27 | 0.79   |
| 0.8           | 10% LRH in 100kb > 4    | 0.26   | 0.23 | 0.75   |
| 0.6           | 10% LRH in 100kb > 4.2  | 0.24   | 0.16 | 0.70   |
| 0.4           | 10% LRH in 100kb > 4.4  | 0.20   | 0.15 | 0.66   |
| 0.2           | 10% LRH in 100kb > 4.65 | 0.11   | 0.13 | 0.56   |
| 0             | 10% LRH in 100kb > 5.4  | 0.07   | 0.02 | 0.29   |
| <i>iHS</i>    |                         |        |      |        |
| 2             | 30% iHS in 100kb >2.8   | 0.54   | 0.56 | 0.89   |
| 1             | 30% iHS in 100kb >3.0   | 0.48   | 0.50 | 0.89   |
| 0.8           | 30% iHS in 100kb >3.1   | 0.47   | 0.47 | 0.88   |
| 0.6           | 30% iHS in 100kb >3.15  | 0.43   | 0.43 | 0.86   |
| 0.4           | 30% iHS in 100kb >3.4   | 0.32   | 0.36 | 0.83   |
| 0.2           | 30% iHS in 100kb >3.75  | 0.24   | 0.25 | 0.71   |
| 0             | 30% iHS in 100kb >5.9   | 0.01   | 0.00 | 0.16   |
| <i>XP-EHH</i> |                         |        |      |        |
| 2             | 1 SNP Xpop > 4          | 0.98   | 0.93 | 0.98   |
| 1             | 1 SNP Xpop >4.4         | 0.97   | 0.93 | 0.99   |
| 0.8           | 1 SNP Xpop>4.5          | 0.96   | 0.89 | 0.98   |
| 0.6           | 1 SNP Xpop>4.6          | 0.95   | 0.89 | 0.96   |
| 0.4           | 1 SNP Xpop>4.65         | 0.95   | 0.87 | 0.95   |
| 0.2           | 1 SNP Xpop>4.8          | 0.94   | 0.80 | 0.94   |
| 0             | 1 SNP Xpop>5.3          | 0.81   | 0.61 | 0.86   |

**Table S5 The FPR of XP-EHH tests under several population demographic scenarios.** We first used a previously validated demographic model for the 3 HapMap populations, CEU, YRI, and CHB+JPT<sup>24</sup> and obtained an 'Overall FPR' for these. We then compared to 4 demographic models: Bottleneck 0.0, 0.1, 0.2 and 0.3, refer to increasing intensities of bottleneck, as measure by the inbreeding coefficient, 0.0, 0.1, 0.2, and 0.3, respectively (Methods).

| <b>Overall FPR</b> | <b>1</b> | <b>0.4</b> | <b>0</b> |
|--------------------|----------|------------|----------|
| Asia               | 0.9      | 0.3        | 0        |
| Europe             | 1.4      | 0.6        | 0        |
| Africa             | 0.8      | 0.3        | 0        |
| Bottleneck 0       | 0.7      | 0.5        | 0        |
| Bottleneck 0.1     | 0.5      | 0.3        | 0        |
| Bottleneck 0.2     | 0.3      | 0.3        | 0        |
| Bottleneck 0.3     | 0        | 0          | 0        |

**Table S6** The mean and standard deviation for the AllEHH logratio with increasing strength of bottleneck.

| <i>Bottleneck vs. YRI</i>     |                      |                          |
|-------------------------------|----------------------|--------------------------|
| Inbreeding Coefficient        | Mean AllEHH logratio | Std Dev All EHH logratio |
| 0                             | -0.032389697         | 0.38512096               |
| 0.1                           | 0.28246412           | 0.42372218               |
| 0.2                           | 0.60321206           | 0.50540924               |
| 0.3                           | 0.8909626            | 0.5617148                |
|                               |                      |                          |
| <i>Bottleneck vs. JPT+CHB</i> |                      |                          |
| Inbreeding Coefficient        | Mean AllEHH logratio | Std Dev All EHH logratio |
| 0                             | -0.002054234         | 0.3377865                |
| 0.1                           | -0.3157318           | 0.39682296               |
| 0.2                           | -0.6341556           | 0.4830781                |
| 0.3                           | -0.9136418           | 0.54949707               |

**Table S7 Candidate Regions for recent selective sweeps using XP-EHH test.** The top regions for the LRH and iHS tests are given in the HapMap Phase 2 paper, a companion paper in this issue.

| Region | Chromosome | Start     | Stop      | Maximum XP-EHH score | Peak SNP ID | Selected Population | Compare Population | Identified in 2 comparisons | Genes in region                                        | (x) identified at 0.4% FPR threshold in simulations, all others identified at 1% FPR |
|--------|------------|-----------|-----------|----------------------|-------------|---------------------|--------------------|-----------------------------|--------------------------------------------------------|--------------------------------------------------------------------------------------|
| 1      | 1          | 30359744  | 30366699  | 4.854                | rs4949250   | CEU                 | JPT+CHB            |                             |                                                        |                                                                                      |
| 2      | 1          | 35109198  | 35164815  | 5.316                | rs11804392  | CEU                 | YRI                |                             | ZMYM6                                                  | x                                                                                    |
| 3      | 2          | 9315721   | 9315721   | 4.79                 | rs875053    | JPT+CHB             | YRI                |                             | DDEF2                                                  |                                                                                      |
| 4      | 2          | 72305454  | 72927242  | 5.53                 | rs6717899   | JPT+CHB             | CEU, YRI           | x                           |                                                        | x                                                                                    |
| 5      | 2          | 108408653 | 108971124 | 5.684                | rs1105109   | JPT+CHB             | CEU, YRI           | x                           | SULT1C2, GCC2, FLJ38668, LIMS1, RANBP2, FLJ32745, EDAR | x                                                                                    |
| 6      | 2          | 135663041 | 136424290 | 5.513                | rs3795901   | CEU                 | YRI, JPT+CHB       | x                           | RAB3GAP1, ZRANB3, R3HDM1, UBXD2, LCT                   | x                                                                                    |
| 7      | 2          | 177317730 | 178285258 | 5.412                | rs1534679   | CEU, JPT+CHB        | CEU, YRI           | x                           | HNRPA3, NFE2L2, AGPS, FLJ30990                         | x                                                                                    |
| 8      | 2          | 206028349 | 206043667 | 5.029                | rs1511873   | CEU                 | YRI                |                             | ALS2CR19                                               |                                                                                      |
| 9      | 2          | 238144810 | 238161079 | 4.893                | rs9287620   | CEU                 | YRI                |                             |                                                        |                                                                                      |
| 10     | 3          | 26230802  | 26239053  | 4.966                | rs11918137  | JPT+CHB             | YRI                |                             |                                                        |                                                                                      |
| 11     | 3          | 108754249 | 108994687 | 5.534                | rs9883282   | JPT+CHB             | CEU                |                             | BBX                                                    | x                                                                                    |
| 12     | 4          | 41984060  | 41989630  | 4.811                | rs6826469   | JPT+CHB             | YRI                |                             | CCDC4                                                  |                                                                                      |
| 13     | 5          | 11886256  | 11893734  | 4.858                | rs12521011  | CEU                 | YRI                |                             | CTNND2                                                 |                                                                                      |
| 14     | 5          | 117381470 | 117679927 | 5.876                | rs11241446  | JPT+CHB             | CEU                |                             |                                                        | x                                                                                    |
| 15     | 5          | 142119542 | 142125869 | 4.866                | rs764387    | CEU                 | YRI                |                             |                                                        |                                                                                      |
| 16     | 10         | 2986576   | 2988247   | 4.812                | rs2454822   | CEU                 | YRI                |                             |                                                        |                                                                                      |
| 17     | 10         | 22642019  | 22798204  | 5.978                | rs12241555  | CEU, JPT+CHB        | YRI                | x                           | COMMD3, BMI1, SPAG6                                    | x                                                                                    |
| 18     | 10         | 55541277  | 55543799  | 4.926                | rs7074276   | JPT+CHB             | CEU                | x                           | PCDH15                                                 |                                                                                      |
| 19     | 10         | 118258077 | 118276595 | 5.009                | rs10885979  | CEU                 | JPT+CHB            |                             |                                                        |                                                                                      |
| 20     | 10         | 127865903 | 127865903 | 4.933                | rs2927508   | CEU                 | JPT+CHB            |                             | ADAM12                                                 |                                                                                      |
| 21     | 11         | 131440546 | 131443589 | 4.958                | rs11828462  | JPT+CHB             | CEU                |                             | HNT                                                    |                                                                                      |
| 22     | 12         | 64360488  | 64364566  | 4.972                | rs10878314  | CEU                 | JPT+CHB            |                             |                                                        |                                                                                      |
| 23     | 12         | 78757457  | 78827321  | 5.1                  | rs7305173   | CEU                 | JPT+CHB            |                             | PPP1R12A                                               | x                                                                                    |
| 24     | 13         | 73770157  | 73770157  | 4.858                | rs17062507  | CEU                 | YRI                |                             |                                                        |                                                                                      |
| 25     | 15         | 26064184  | 26088260  | 4.862                | rs10438451  | CEU                 | YRI                |                             | HERC2                                                  |                                                                                      |
| 26     | 15         | 29003953  | 29073042  | 4.943                | rs7170710   | JPT+CHB             | YRI                |                             | KIAA1018, MTMR10                                       |                                                                                      |
| 27     | 15         | 46155214  | 46657748  | 6.413                | rs1559857   | CEU                 | YRI, JPT+CHB       | x                           | SLC24A5, MYEF2, SLC12A1, DUT, FBN1                     | x                                                                                    |
| 28     | 15         | 61748992  | 61848071  | 5.251                | rs16947373  | JPT+CHB             | YRI                |                             | HERC1                                                  | x                                                                                    |
| 29     | 16         | 64165845  | 64452865  | 5.287                | rs410941    | JPT+CHB             | CEU, YRI           | x                           |                                                        | x                                                                                    |
| 30     | 16         | 77061737  | 77089133  | 5.178                | rs16947649  | CEU                 | YRI                |                             | WVVOX                                                  | x                                                                                    |
| 31     | 17         | 53305194  | 53357191  | 5.984                | rs9898004   | JPT+CHB             | CEU, YRI           | x                           | CUEDC1                                                 | x                                                                                    |
| 32     | 17         | 56419222  | 56515445  | 5.385                | rs8073202   | CEU                 | YRI                |                             | BCAS3                                                  | x                                                                                    |
| 33     | 22         | 45109651  | 45133715  | 4.843                | rs16995204  | JPT+CHB             | YRI                |                             | CELSR1                                                 |                                                                                      |
| 34     | 23         | 18881880  | 19138487  | 5.637                | rs7341964   | CEU                 | YRI                |                             | GPR64, PDHA1, MAP3K15                                  | x                                                                                    |
| 35     | 23         | 35759035  | 35939638  | 6.065                | rs5973574   | CEU                 | YRI                |                             | CXorf22, RP13-11B7.1                                   | x                                                                                    |

Table S7 continued.

| Region | Chromosome | Start     | Stop      | Maximum XP-EHH score | Peak SNP ID | Selected Population | Compare Population | Identified in 2 comparisons | Genes in region                                  | (x) identified at 0.4% FPR threshold in simulations, all others identified at 1% FPR |
|--------|------------|-----------|-----------|----------------------|-------------|---------------------|--------------------|-----------------------------|--------------------------------------------------|--------------------------------------------------------------------------------------|
| 36     | 23         | 36476826  | 36521901  | 5.248                | rs5973753   | JPT+CHB             | YRI                |                             |                                                  | x                                                                                    |
| 37     | 23         | 37069665  | 37555024  | 5.844                | rs17144310  | CEU, JPT+CHB        | YRI                | x                           | PRRG1, LANCL3, LOC644106, XK, CYBB, DYNLT3       | x                                                                                    |
| 38     | 23         | 109767056 | 111117626 | 6.392                | rs10521530  | CEU, JPT+CHB        | YRI                | x                           | CHRD1, PAK3, CAPN6, DCX, GLT28D1, CXorf45, TRPC5 | x                                                                                    |
| 39     | 23         | 113291719 | 113296616 | 4.938                | rs12389690  | JPT+CHB             | YRI                |                             |                                                  |                                                                                      |
| 40     | 23         | 141796760 | 141804088 | 4.868                | rs5953797   | CEU                 | YRI                |                             |                                                  |                                                                                      |
| 41     | 23         | 147341578 | 147421230 | 5.107                | rs956659    | JPT+CHB             | CEU                |                             | AFF2                                             | x                                                                                    |
| 42     | 23         | 150287808 | 150488109 | 5.082                | rs12860832  | JPT+CHB             | YRI                |                             | PASD1                                            |                                                                                      |

**Table S8. Fraction of SNPs estimated to be genotyped in the HapMap and to be identified in dbSNP.** We estimated these numbers using full sequence data from the ENCODE project, assuming it is representative of the true genome, and applied a correction for those SNPs likely missed by ENCODE (only important for very low frequency SNPs, < 5%).

| <b>% of SNPs in HapMap</b> | <b>YRI</b> | <b>CEU</b> | <b>JBT+CHB</b> |
|----------------------------|------------|------------|----------------|
| MAF > 5%                   | 43         | 46         | 49             |
| MAF > 20%                  | 56         | 50         | 51             |
| <b>% of SNPs in dbSNP</b>  |            |            |                |
| MAF > 5%                   | 66         | 81         | 79             |
| MAF > 20%                  | 86         | 90         | 88             |

Table S9. Forty-one polymorphisms with multiple lines of evidence for selection.

| Region | SNP ID     | Gene            | SNP Class            |
|--------|------------|-----------------|----------------------|
| 1      | rs1028180  | <i>BLZF1</i>    | amino acid: Q > R    |
| 1      | rs3862937  | <i>SLC19A2</i>  | conserved intron     |
| 3      | rs3827760  | <i>EDAR</i>     | amino acid: V > A    |
| 3      | rs17261772 | <i>RAB3GAP1</i> | conserved 3' UTR     |
| 4      | rs1446585  | <i>R3HDM1</i>   | conserved intron     |
| 4      | rs4988235  | <i>LCT</i>      | promoter             |
| 5      | rs1513875  |                 | conserved intron     |
| 5      | rs6706063  |                 | conserved intron     |
| 5      | rs6706426  |                 | conserved intron     |
| 5      | rs6758766  |                 | conserved intron     |
| 5      | rs2037044  |                 | conserved noncoding  |
| 5      | rs13005005 |                 | conserved noncoding  |
| 5      | rs17626597 |                 | conserved noncoding  |
| 5      | rs17627058 |                 | conserved noncoding  |
| 5      | rs3770005  | <i>PDE11A</i>   | conserved noncoding  |
| 7      | rs1047626  | <i>SLC30A9</i>  | amino acid: M > V    |
| 7      | rs2660326  | <i>SLC30A9</i>  | conserved intron     |
| 7      | rs3827590  | <i>SLC30A9</i>  | conserved intron     |
| 7      | rs3827591  | <i>SLC30A9</i>  | conserved intron     |
| 7      | rs4861155  | <i>SLC30A9</i>  | conserved intron     |
| 7      | rs13756    |                 | conserved noncoding  |
| 8      | rs11100128 |                 | conserved noncoding  |
| 11     | rs10903929 |                 | conserved noncoding  |
| 13     | rs16905686 | <i>PCDH15</i>   | transcription factor |
| 13     | rs4935502  | <i>PCDH15</i>   | amino acid: D > A    |
| 16     | rs1426654  | <i>SLC24A5</i>  | amino acid: T > A    |
| 17     | rs10851731 | <i>HERC1</i>    | conserved coding     |
| 17     | rs2229749  | <i>HERC1</i>    | amino acid: E > D    |
| 17     | rs2272209  | <i>HERC1</i>    | conserved intron     |
| 17     | rs2228511  | <i>HERC1</i>    | conserved coding     |
| 17     | rs6494428  | <i>HERC1</i>    | conserved intron     |
| 17     | rs16947373 | <i>HERC1</i>    | conserved intron     |
| 19     | rs2242406  | <i>CHST5</i>    | conserved 5' UTR     |
| 19     | rs3743599  | <i>ADAT1</i>    | amino acid: T > N    |
| 19     | rs6834     | <i>KARS</i>     | amino acid: T > S    |
| 21     | rs9303429  | <i>BCAS3</i>    | conserved intron     |
| 21     | rs6504005  | <i>BCAS3</i>    | conserved intron     |
| 21     | rs6504010  | <i>BCAS3</i>    | conserved intron     |
| 24     | rs1573662  | <i>LARGE</i>    | conserved 5' UTR     |
| 24     | rs5999077  | <i>LARGE</i>    | conserved intron     |
| 24     | rs1013337  | <i>LARGE</i>    | conserved 5' UTR     |

**Table S10: Nonsynonymous, derived, differentiated alleles in HapMap2**

| SNP ID     | Chromosome | HG17 position | Gene     | CEU Derived Allele Freq | YRI Derived Allele Freq | JPT+CHB Derived Allele Freq | Fst percentile | Tested population | Long Haplotype Signal |
|------------|------------|---------------|----------|-------------------------|-------------------------|-----------------------------|----------------|-------------------|-----------------------|
| rs12142199 | 1          | 1289110       | CPSF3L   | 0.775                   | 0.0083                  | 0.0278                      | 1              | C                 |                       |
| rs2072994  | 1          | 11513736      |          | 0.6667                  | 0.0167                  | 0.2667                      | 1              | C                 |                       |
| rs2296224  | 1          | 20756858      | KIF17    | 0.9917                  | 0.0083                  | 0.0444                      | 1              | C                 |                       |
| rs7537203  | 1          | 35895041      | CLSPN    | 0.125                   | 0.7083                  | 0.7944                      | 1              | YJ                |                       |
| rs2056899  | 1          | 47319871      | CYP4A22  | 0.6167                  | 0.0167                  | 0                           | 1              | C                 |                       |
| rs1288389  | 1          | 53256618      | PODN     | 0.1                     | 0.6417                  | 0.6722                      | 1              | YJ                |                       |
| rs4915691  | 1          | 65579540      | DNAJC6   | 0.975                   | 0.325                   | 0.3833                      | 1              | C                 |                       |
| rs1137100  | 1          | 65748462      | LEPR     | 0.3417                  | 0.1167                  | 0.8278                      | 1              | J                 |                       |
| rs3819946  | 1          | 74887907      | CRYZ     | 0.8833                  | 0.3917                  | 0.2222                      | 1              | C                 |                       |
| rs12041465 | 1          | 75321070      | LHX8     | 0.1833                  | 0.1167                  | 0.8333                      | 1              | J                 |                       |
| rs2815413  | 1          | 93384744      | CCDC18   | 0.85                    | 0.2583                  | 0.9611                      | 0.99           | CJ                |                       |
| rs2229496  | 1          | 149695683     | IVL      | 0.9167                  | 0.3                     | 0.3722                      | 1              | C                 |                       |
| rs2061690  | 1          | 151732153     | PBXIP1   | 0.4333                  | 0.0833                  | 0.8944                      | 1              | J                 |                       |
| rs6682716  | 1          | 153364921     |          | 0.7333                  | 0.0333                  | 0.3056                      | 1              | C                 |                       |
| rs926103   | 1          | 153598055     | SH2D2A   | 0.2583                  | 0.2333                  | 0.8722                      | 1              | J                 | **                    |
| rs12075    | 1          | 155988427     | DARC     | 0.4833                  | 0                       | 0.9056                      | 1              | J                 |                       |
| rs1028180  | 1          | 166077526     | BLZF1    | 0.0083                  | 0.05                    | 0.7                         | 1              | J                 | **                    |
| rs6020     | 1          | 166250770     | F5       | 0                       | 0.3167                  | 0.7                         | 1              | J                 |                       |
| rs6696455  | 1          | 171819386     | TNN      | 0.5333                  | 0.0833                  | 0.9222                      | 1              | CJ                |                       |
| rs155443   | 1          | 186295442     |          | 0                       | 0.65                    | 0                           | 1              | Y                 |                       |
| rs6003     | 1          | 193762678     | F13B     | 0.925                   | 0.275                   | 0.9611                      | 1              | CJ                |                       |
| rs1361754  | 1          | 202533529     | FLJ32569 | 0.6                     | 0.3333                  | 0                           | 0.99           | C                 |                       |
| rs291102   | 1          | 203494873     | PIGR     | 0.025                   | 0.85                    | 0.1222                      | 1              | Y                 |                       |
| rs2070065  | 1          | 211199639     | CENPF    | 0.9417                  | 0.2083                  | 0.8333                      | 1              | CJ                |                       |
| rs2666839  | 1          | 211204619     | CENPF    | 0.9417                  | 0.2083                  | 0.8333                      | 1              | CJ                |                       |
| rs335524   | 1          | 211214591     | CENPF    | 0.375                   | 0.25                    | 0.9056                      | 1              | J                 |                       |
| rs2275303  | 1          | 228845954     | SIPA1L2  | 0                       | 0                       | 0.6                         | 1              | J                 |                       |
| rs2642992  | 1          | 243477598     | ZNF695   | 0.3917                  | 0.775                   | 0.0056                      | 1              | Y                 |                       |
| rs7555046  | 1          | 244264946     |          | 0.8917                  | 0.1083                  | 0.9778                      | 1              | CJ                |                       |
| rs7567833  | 2          | 3184917       | COLEC11  | 0.9583                  | 0.1333                  | 0.9889                      | 1              | CJ                |                       |
| rs2715860  | 2          | 9479134       | DDEF2    | 0.6333                  | 0.0667                  | 0.8444                      | 1              | CJ                | **                    |
| rs2288709  | 2          | 43915661      | DYNC2LI1 | 0.6417                  | 0.0333                  | 0.8667                      | 1              | CJ                | **                    |
| rs3813227  | 2          | 73563622      | ALMS1    | 0.8                     | 0.075                   | 0.9889                      | 1              | CJ                |                       |
| rs6546837  | 2          | 73589553      | ALMS1    | 0.8                     | 0.075                   | 0.9889                      | 1              | CJ                |                       |
| rs6546838  | 2          | 73590935      | ALMS1    | 0.8                     | 0.0917                  | 0.9889                      | 1              | CJ                |                       |
| rs6724782  | 2          | 73591645      | ALMS1    | 0.8                     | 0.075                   | 0.9889                      | 1              | CJ                |                       |
| rs6546839  | 2          | 73592163      | ALMS1    | 0.8                     | 0.075                   | 0.9889                      | 1              | CJ                |                       |
| rs2056486  | 2          | 73629222      | ALMS1    | 0.8                     | 0.0917                  | 0.9889                      | 1              | CJ                |                       |
| rs10193972 | 2          | 73629311      | ALMS1    | 0.8                     | 0.0917                  | 0.9889                      | 1              | CJ                |                       |
| rs1063588  | 2          | 74602033      | GCS1     | 0.0917                  | 0.8667                  | 0.8333                      | 1              | YJ                |                       |
| rs1047911  | 2          | 74611433      | MRPL53   | 0.0917                  | 0.85                    | 0.8333                      | 1              | YJ                |                       |
| rs6707475  | 2          | 74622146      | FLJ12788 | 0.9                     | 0.0083                  | 0.1667                      | 1              | C                 | **                    |
| rs17009998 | 2          | 74636833      | LBX2     | 0.0917                  | 0.15                    | 0.8333                      | 1              | J                 |                       |
| rs2231250  | 2          | 74667831      | AUP1     | 0.1167                  | 0.725                   | 0.8333                      | 1              | YJ                |                       |

| SNP ID     | Chromosome | HG17 position | Gene        | CEU Derived Allele Freq | YRI Derived Allele Freq | JPT+CHB Derived Allele Freq | Fst percentile | Tested population | Long Haplotype Signal |
|------------|------------|---------------|-------------|-------------------------|-------------------------|-----------------------------|----------------|-------------------|-----------------------|
| rs2305160  | 2          | 101049822     | NPAS2       | 0.3167                  | 0.0333                  | 1                           | 1              | J                 |                       |
| rs1402467  | 2          | 108453326     | SULT1C2     | 0.8083                  | 0.0583                  | 0.8833                      | 1              | CJ                | **                    |
| rs3827760  | 2          | 108972119     | EDAR        | 0                       | 0                       | 0.8667                      | 1              | J                 | **                    |
| rs9287519  | 2          | 132111197     |             | 0.1667                  | 0                       | 0.6778                      | 1              | J                 |                       |
| rs1438307  | 2          | 136332898     |             | 0.8167                  | 0.05                    | 0.4389                      | 1              | C                 | **                    |
| rs10186922 | 2          | 159556973     |             | 0.125                   | 0.8167                  | 0.8722                      | 1              | YJ                |                       |
| rs6738031  | 2          | 167105429     | SCN7A       | 0.3167                  | 0                       | 0.75                        | 0.99           | J                 |                       |
| rs10497520 | 2          | 179470361     | TTN         | 0.8917                  | 0.3417                  | 0.2111                      | 1              | C                 |                       |
| rs4667001  | 2          | 185627253     | C2orf10     | 0.6167                  | 0.025                   | 0.8667                      | 1              | CJ                |                       |
| rs1366842  | 2          | 185627749     | C2orf10     | 0.6167                  | 0.025                   | 0.8667                      | 1              | CJ                |                       |
| rs13396213 | 2          | 201593744     | NIF3L1      | 0.7667                  | 0.2333                  | 0.9944                      | 1              | CJ                |                       |
| rs11890512 | 2          | 215736230     | ABCA12      | 0.025                   | 0.65                    | 0                           | 1              | Y                 |                       |
| rs586194   | 2          | 219435938     | TTLL4       | 0.6083                  | 0.025                   | 0.8556                      | 1              | CJ                |                       |
| rs3731892  | 2          | 219961856     |             | 0.9                     | 0.2333                  | 0.3056                      | 1              | C                 |                       |
| rs394558   | 3          | 10277172      | TATDN2      | 0.5833                  | 0.6333                  | 0.0389                      | 1              | CY                |                       |
| rs1839022  | 3          | 27022506      |             | 0.3                     | 1                       | 1                           | 1              | YJ                |                       |
| rs1126478  | 3          | 46476217      | LTF         | 0.7333                  | 0.0167                  | 0.35                        | 1              | C                 |                       |
| rs887515   | 3          | 52498445      | NISCH       | 0.8333                  | 0.275                   | 0.9944                      | 0.99           | CJ                |                       |
| rs1131356  | 3          | 58084202      | FLNB        | 0.2167                  | 0.4667                  | 0.9222                      | 1              | J                 |                       |
| rs12632456 | 3          | 58093595      | FLNB        | 0.2083                  | 0.575                   | 0.9722                      | 1              | YJ                |                       |
| rs9868484  | 3          | 109671683     |             | 0.7583                  | 0.675                   | 0                           | 1              | CY                |                       |
| rs9288952  | 3          | 113667715     | BTLA        | 0.9583                  | 0.125                   | 0.7278                      | 1              | CJ                |                       |
| rs2306857  | 3          | 114209874     | C3orf17     | 0.8417                  | 0.1333                  | 0.3833                      | 1              | C                 |                       |
| rs11539377 | 3          | 120702263     | C3orf1      | 0.9917                  | 0.375                   | 0.9889                      | 1              | CJ                |                       |
| rs17310144 | 3          | 125148592     | CCDC14      | 0.675                   | 0.075                   | 0.0944                      | 1              | C                 | **                    |
| rs641320   | 3          | 139830655     | FAIM        | 0.9583                  | 0.1833                  | 0.9889                      | 1              | CJ                |                       |
| rs13043    | 3          | 139830686     | FAIM        | 0.0083                  | 0.6667                  | 0                           | 1              | Y                 |                       |
| rs11499    | 3          | 182176757     | FXR1        | 0.9917                  | 0                       | 0                           | 1              | C                 |                       |
| rs734312   | 4          | 6421426       | WFS1        | 0.7167                  | 0                       | 0.8556                      | 1              | CJ                |                       |
| rs2227852  | 4          | 9460634       | DRD5        | 0.9917                  | 0                       | 0                           | 1              | C                 | **                    |
| rs3733591  | 4          | 9598399       | SLC2A9      | 0.1917                  | 0.0333                  | 0.7056                      | 0.99           | J                 |                       |
| rs4590080  | 4          | 41475705      | KFZP686A012 | 0.9583                  | 0.225                   | 0.9833                      | 1              | CJ                |                       |
| rs1047626  | 4          | 41844599      | SLC30A9     | 0.7333                  | 0.0583                  | 0.9667                      | 1              | CJ                | **                    |
| rs5825     | 4          | 46567077      |             | 0.9917                  | 0                       | 0                           | 1              | C                 |                       |
| rs2289443  | 4          | 75388744      | MTHFD2L     | 0.9583                  | 0.1583                  | 0.85                        | 1              | CJ                |                       |
| rs17014118 | 4          | 89676474      | HERC6       | 0.7917                  | 0.1417                  | 0.3222                      | 1              | C                 |                       |
| rs1229984  | 4          | 100596497     | ADH1B       | 0                       | 0                       | 0.7556                      | 1              | J                 |                       |
| rs10009368 | 4          | 135479206     |             | 0.7167                  | 0.2583                  | 0.0056                      | 1              | C                 |                       |
| rs11559290 | 4          | 159959281     | ETFDH       | 0.8167                  | 0.125                   | 0.9833                      | 1              | CJ                |                       |
| rs2438652  | 5          | 10292261      | LOC134145   | 0.1333                  | 0.0833                  | 0.8667                      | 1              | J                 |                       |
| rs16891982 | 5          | 33987450      | SLC45A2     | 1                       | 0                       | 0                           | 1              | C                 | **                    |
| rs37369    | 5          | 35072872      | AGXT2       | 0.1083                  | 0.7                     | 0.5944                      | 1              | YJ                |                       |
| rs1864183  | 5          | 81584972      | ATG10       | 0.4583                  | 0.175                   | 0.9333                      | 1              | J                 |                       |
| rs1864182  | 5          | 81584996      | ATG10       | 0.4167                  | 0.825                   | 0.05                        | 1              | Y                 |                       |

| SNP ID     | Chromosome | HG17 position | Gene      | CEU Derived Allele Freq | YRI Derived Allele Freq | JPT+CHB Derived Allele Freq | Fst percentile | Tested population | Long Haplotype Signal |
|------------|------------|---------------|-----------|-------------------------|-------------------------|-----------------------------|----------------|-------------------|-----------------------|
| rs12515587 | 5          | 141229147     | PCDH1     | 0.8583                  | 0.1917                  | 0.9778                      | 1              | CJ                |                       |
| rs7709485  | 5          | 145875089     | GPR151    | 0.1583                  | 0.2                     | 0.7778                      | 1              | J                 |                       |
| rs2256966  | 5          | 178346422     | GRM6      | 0.2333                  | 1                       | 0.9722                      | 1              | YJ                |                       |
| rs10060182 | 5          | 179218358     | LOC51149  | 0.175                   | 0.15                    | 0.7944                      | 1              | J                 |                       |
| rs11738161 | 5          | 180052616     |           | 0.75                    | 0.15                    | 0.2444                      | 1              | C                 |                       |
| rs1042391  | 6          | 16398740      | GMPT      | 0.65                    | 0.0917                  | 0.0944                      | 1              | C                 |                       |
| rs2274305  | 6          | 24399182      | DCDC2     | 0.675                   | 0.0083                  | 0.7333                      | 1              | CJ                |                       |
| rs2229642  | 6          | 33767450      | ITPR3     | 0.575                   | 0.85                    | 0.1056                      | 1              | CY                |                       |
| rs4713668  | 6          | 33798774      | IHPK3     | 0.3833                  | 0.0833                  | 0.8222                      | 1              | J                 |                       |
| rs9349180  | 6          | 41293452      |           | 0.775                   | 0.1583                  | 0.8944                      | 1              | CJ                |                       |
| rs239798   | 6          | 54913647      | FAM83B    | 0.825                   | 0.225                   | 0.9889                      | 1              | CJ                |                       |
| rs7383447  | 6          | 80077256      |           | 0.6083                  | 0.0167                  | 0.1778                      | 1              | C                 |                       |
| rs7745023  | 6          | 121619069     | C6orf170  | 0.6167                  | 0.0583                  | 0.0833                      | 1              | C                 |                       |
| rs675531   | 6          | 128082532     | C6orf190  | 0.2167                  | 0.275                   | 0.8611                      | 1              | J                 |                       |
| rs1044498  | 6          | 132214061     | ENPP1     | 0.8667                  | 0.075                   | 0.9389                      | 1              | CJ                |                       |
| rs6926101  | 6          | 133146813     | C6orf192  | 0.95                    | 0.3167                  | 0.9889                      | 1              | CJ                |                       |
| rs4236176  | 6          | 169888355     | WDR27     | 0.3                     | 0.4083                  | 0.9222                      | 1              | J                 |                       |
| rs1078211  | 6          | 170018932     | C6orf208  | 0.55                    | 0.0667                  | 0.0167                      | 1              | C                 |                       |
| rs2301721  | 7          | 26969353      | HOXA7     | 0.85                    | 0.0667                  | 0.8444                      | 1              | CJ                |                       |
| rs11765552 | 7          | 97466766      | LMTK2     | 0.525                   | 0                       | 0.0722                      | 1              | C                 |                       |
| rs542137   | 7          | 100017728     | ZAN       | 0.3667                  | 0.1583                  | 0.85                        | 1              | J                 |                       |
| rs539445   | 7          | 100018018     | ZAN       | 0.6333                  | 0.8417                  | 0.15                        | 1              | CY                |                       |
| rs1627354  | 7          | 107271935     | LAMB4     | 0.0417                  | 0.7167                  | 0                           | 1              | Y                 |                       |
| rs10260756 | 7          | 107283795     | LAMB4     | 0                       | 0.7                     | 0.0056                      | 1              | Y                 |                       |
| rs2908004  | 7          | 120563720     | WNT16     | 0.6333                  | 0.0667                  | 0.8444                      | 1              | CJ                |                       |
| rs10265    | 7          | 138483407     | HSPC268   | 0.8083                  | 0.0917                  | 0.7833                      | 1              | CJ                |                       |
| rs7781826  | 7          | 143569849     |           | 0.25                    | 0.35                    | 0.9056                      | 1              | J                 |                       |
| rs2948305  | 8          | 8135987       |           | 0.4                     | 0.0083                  | 0.8222                      | 1              | J                 |                       |
| rs6601495  | 8          | 10517787      | RP1L1     | 0                       | 0.8583                  | 0                           | 1              | Y                 |                       |
| rs7461273  | 8          | 11815386      |           | 0.575                   | 0.1417                  | 0.9611                      | 1              | CJ                |                       |
| rs4871857  | 8          | 23115269      | TNFRSF10A | 0.5917                  | 0.7583                  | 0.0222                      | 1              | CY                |                       |
| rs6557634  | 8          | 23116201      | TNFRSF10A | 0.4083                  | 0.25                    | 0.9778                      | 1              | J                 |                       |
| rs323344   | 8          | 30822067      | TEX15     | 0.1167                  | 0.9                     | 0.05                        | 1              | Y                 |                       |
| rs323345   | 8          | 30822144      | TEX15     | 0.8833                  | 0.1                     | 0.95                        | 1              | CJ                |                       |
| rs323346   | 8          | 30822973      | TEX15     | 0.1833                  | 0.8417                  | 0.0889                      | 1              | Y                 |                       |
| rs323347   | 8          | 30825766      | TEX15     | 0.8167                  | 0.1                     | 0.9111                      | 1              | CJ                |                       |
| rs3924999  | 8          | 32572900      | NRG1      | 0.3583                  | 0.0167                  | 0.7944                      | 1              | J                 |                       |
| rs7818806  | 8          | 50816259      |           | 0.8167                  | 0.1083                  | 0.8333                      | 1              | CJ                |                       |
| rs6987308  | 8          | 144847859     | ZNF707    | 0.0917                  | 0.5                     | 0.75                        | 1              | J                 |                       |
| rs1871534  | 8          | 145610489     | SLC39A4   | 0                       | 0.9833                  | 0                           | 1              | Y                 |                       |
| rs3747532  | 9          | 14712477      | CER1      | 0.6417                  | 0.125                   | 0.9556                      | 1              | CJ                |                       |
| rs10972048 | 9          | 34300927      |           | 0.7083                  | 0.0333                  | 0.3111                      | 1              | C                 |                       |
| rs2282192  | 9          | 97751893      | C9orf156  | 0.275                   | 0.85                    | 0.8                         | 1              | YJ                | **                    |
| rs1265891  | 9          | 114189666     | AKNA      | 1                       | 0.275                   | 0.9556                      | 1              | CJ                |                       |

| SNP ID     | Chromosome | HG17 position | Gene      | CEU Derived Allele Freq | YRI Derived Allele Freq | JPT+CHB Derived Allele Freq | Fst percentile | Tested population | Long Haplotype Signal |
|------------|------------|---------------|-----------|-------------------------|-------------------------|-----------------------------|----------------|-------------------|-----------------------|
| rs10985704 | 9          | 122410232     | OR1L8     | 0.5083                  | 0.4333                  | 0.0056                      | 0.99           | C                 |                       |
| rs1476859  | 9          | 122470681     | OR1B1     | 0.6667                  | 0.975                   | 0.2056                      | 1              | CY                |                       |
| rs1572912  | 9          | 128645108     | TBC1D13   | 0.7417                  | 0.0417                  | 0.6833                      | 1              | CJ                |                       |
| rs2966332  | 9          | 131212933     | PPAPDC3   | 0                       | 0.4083                  | 0.7278                      | 1              | J                 |                       |
| rs543573   | 9          | 132232383     | SETX      | 0.9                     | 0.3083                  | 0.3222                      | 1              | C                 | **                    |
| rs1183768  | 9          | 132232785     | SETX      | 0.9                     | 0.3083                  | 0.3222                      | 1              | C                 | **                    |
| rs602990   | 9          | 133673548     | VAV2      | 0.475                   | 0.0833                  | 0.9889                      | 1              | J                 |                       |
| rs15772    | 10         | 15185861      | RPP38     | 0.75                    | 0.05                    | 0.9167                      | 1              | CJ                |                       |
| rs7074847  | 10         | 22715863      | SPAG6     | 0.0083                  | 0.675                   | 0                           | 1              | Y                 | **                    |
| rs4935502  | 10         | 55625450      | PCDH15    | 0.1583                  | 0.1667                  | 0.8944                      | 1              | J                 | **                    |
| rs4536103  | 10         | 71002210      | NEUROG3   | 0                       | 0.9833                  | 0.9889                      | 1              | YJ                |                       |
| rs10785923 | 10         | 91728536      |           | 0.525                   | 0.3833                  | 0.9667                      | 1              | CJ                |                       |
| rs2862954  | 10         | 101902054     | SPFH1     | 0.5333                  | 0.0083                  | 0.0667                      | 1              | C                 |                       |
| rs7099565  | 10         | 116709533     | TRUB1     | 0.6083                  | 0.2                     | 0.9722                      | 1              | CJ                |                       |
| rs10794208 | 10         | 126905364     |           | 0.6167                  | 0.0917                  | 0.9056                      | 1              | CJ                |                       |
| rs331537   | 11         | 4427852       | OR52K2    | 0.0333                  | 0.775                   | 0.0333                      | 1              | Y                 |                       |
| rs1462983  | 11         | 6086413       | OR56B4    | 0.4833                  | 0.05                    | 0.8667                      | 1              | J                 |                       |
| rs7130656  | 11         | 45789085      | SLC35C1   | 0.325                   | 0.775                   | 1                           | 1              | YJ                |                       |
| rs3736508  | 11         | 45931706      | PHF21A    | 0.0167                  | 0                       | 0.5889                      | 1              | J                 |                       |
| rs2260655  | 11         | 60865550      | DAK       | 1                       | 0.3417                  | 0.9667                      | 1              | CJ                |                       |
| rs7103126  | 11         | 68819969      | MYEOV     | 0.8417                  | 0.1167                  | 0.5111                      | 0.99           | CJ                |                       |
| rs557881   | 12         | 189386        | SLC6A12   | 0.5333                  | 0.325                   | 1                           | 1              | CJ                |                       |
| rs12319376 | 12         | 1424058       | ERC1      | 0.9167                  | 0.275                   | 0.9889                      | 1              | CJ                |                       |
| rs1984564  | 12         | 6960454       | MBOAT5    | 0.95                    | 0.3083                  | 0.9722                      | 1              | CJ                |                       |
| rs1124164  | 12         | 10640842      | KLRA1     | 0                       | 0.6167                  | 0                           | 1              | Y                 |                       |
| rs708167   | 12         | 27126266      |           | 0.5083                  | 0.0333                  | 0.0278                      | 1              | C                 |                       |
| rs7133970  | 12         | 51412341      |           | 0.7667                  | 0.2583                  | 0.9944                      | 0.99           | CJ                |                       |
| rs2171497  | 12         | 53630400      |           | 0.1083                  | 0.0417                  | 0.6778                      | 1              | J                 |                       |
| rs939875   | 12         | 63555314      |           | 0.9583                  | 0.25                    | 1                           | 1              | CJ                |                       |
| rs7978197  | 12         | 67612814      | CPM       | 0.9833                  | 0.3917                  | 1                           | 0.99           | CJ                |                       |
| rs10777084 | 12         | 86882562      | C12orf50  | 0.1083                  | 0.8083                  | 0.0389                      | 1              | Y                 |                       |
| rs4964460  | 12         | 105207441     | TCP11L2   | 0.1417                  | 0                       | 0.7                         | 1              | J                 |                       |
| rs3742000  | 12         | 110801259     |           | 0.775                   | 0.1833                  | 0.1111                      | 1              | C                 |                       |
| rs12231744 | 12         | 110939775     | C12orf30  | 0                       | 0.0583                  | 0.6                         | 0.99           | J                 |                       |
| rs7318174  | 13         | 19036252      |           | 0.7333                  | 0.1333                  | 0.9333                      | 1              | CJ                |                       |
| rs7995033  | 13         | 24729888      | MTMR6     | 0.8667                  | 0.0583                  | 0.5333                      | 1              | CJ                |                       |
| rs1056820  | 13         | 40413286      | ELF1      | 0.7167                  | 0.0917                  | 0.2222                      | 1              | C                 |                       |
| rs17099455 | 14         | 23492847      | DHRS4     | 0.9417                  | 0.2833                  | 0.9833                      | 1              | CJ                |                       |
| rs2229309  | 14         | 23908923      | NFATC4    | 0.6333                  | 0.0417                  | 0.1722                      | 1              | C                 |                       |
| rs7149586  | 14         | 23915681      | NFATC4    | 0.3                     | 0.8417                  | 0.8278                      | 1              | YJ                |                       |
| rs2274068  | 14         | 35222928      | GARNL1    | 0.8583                  | 0.275                   | 0.3111                      | 1              | C                 |                       |
| rs2274271  | 14         | 54725445      | DLG7      | 0.9083                  | 0.15                    | 0.7444                      | 0.99           | CJ                |                       |
| rs3742578  | 14         | 56742468      | EXOC5     | 0.1333                  | 0.8833                  | 0.0667                      | 1              | Y                 |                       |
| rs11844594 | 14         | 76913567      | C14orf174 | 0.4917                  | 0.0917                  | 0.9222                      | 1              | J                 |                       |

| SNP ID     | Chromosome | HG17 position | Gene        | CEU Derived Allele Freq | YRI Derived Allele Freq | JPT+CHB Derived Allele Freq | Fst percentile | Tested population | Long Haplotype Signal |
|------------|------------|---------------|-------------|-------------------------|-------------------------|-----------------------------|----------------|-------------------|-----------------------|
| rs2193595  | 14         | 76914874      | C14orf174   | 0.4833                  | 0.0917                  | 0.9222                      | 1              | J                 |                       |
| rs3742728  | 14         | 77020877      | THSD3       | 0.5833                  | 0.1417                  | 0.9444                      | 1              | CJ                |                       |
| rs1800414  | 15         | 25870632      | OCA2        | 0                       | 0                       | 0.5833                      | 1              | J                 |                       |
| rs8040932  | 15         | 27134311      | APBA2       | 0.85                    | 0.175                   | 0.8667                      | 1              | CJ                |                       |
| rs936212   | 15         | 38368835      | PLCB2       | 0                       | 0                       | 0.5889                      | 1              | J                 |                       |
| rs12911738 | 15         | 38690976      | CASC5       | 0.1083                  | 0.075                   | 0.6944                      | 1              | J                 |                       |
| rs8040502  | 15         | 38702482      | CASC5       | 0.1083                  | 0.075                   | 0.6944                      | 1              | J                 |                       |
| rs3816533  | 15         | 39921389      | PLA2G4B     | 0.1583                  | 0                       | 0.7056                      | 1              | J                 |                       |
| rs1456235  | 15         | 39936764      | SPTBN5      | 0.6                     | 0.0667                  | 0.9667                      | 1              | CJ                |                       |
| rs7181742  | 15         | 40430821      | GANC, CAPN3 | 0.9                     | 0.225                   | 0.8778                      | 0.99           | CJ                |                       |
| rs1801449  | 15         | 40468491      | CAPN3       | 0.9417                  | 0.2333                  | 0.9111                      | 1              | CJ                |                       |
| rs12917189 | 15         | 40810774      | CDAN1       | 0.75                    | 0.0083                  | 0.7167                      | 1              | CJ                |                       |
| rs689647   | 15         | 41549488      | TP53BP1     | 0.0667                  | 0.8                     | 0.4778                      | 1              | Y                 |                       |
| rs2245715  | 15         | 41605344      | MAP1A       | 0.075                   | 0.7417                  | 0.5167                      | 1              | YJ                |                       |
| rs1704792  | 15         | 43008164      |             | 0.95                    | 0.0417                  | 0.55                        | 1              | CJ                |                       |
| rs269868   | 15         | 43179367      | DUOX2       | 0.9833                  | 0.1667                  | 0.9333                      | 1              | CJ                |                       |
| rs11854484 | 15         | 43332770      | SLC28A2     | 0.7                     | 0.0917                  | 0.0667                      | 1              | C                 |                       |
| rs1060896  | 15         | 43341559      | SLC28A2     | 0.7333                  | 0.0833                  | 0.0667                      | 1              | C                 |                       |
| rs1288775  | 15         | 43448970      | GATM        | 0.825                   | 0.1167                  | 0.1833                      | 1              | C                 |                       |
| rs1426654  | 15         | 46213776      | SLC24A5     | 1                       | 0.025                   | 0.0111                      | 1              | C                 | **                    |
| rs2229749  | 15         | 61724262      | HERC1       | 0.0417                  | 0.1833                  | 0.9056                      | 1              | J                 | **                    |
| rs2010875  | 15         | 62944535      | PLEKHQ1     | 0.075                   | 0.175                   | 0.7944                      | 1              | J                 | **                    |
| rs5742915  | 15         | 72123686      | PML         | 0.55                    | 0.0167                  | 0.0056                      | 1              | C                 |                       |
| rs1036938  | 15         | 77024302      | CTSH        | 0.2917                  | 0.8583                  | 0.8722                      | 1              | YJ                |                       |
| rs2242046  | 15         | 83279733      | SLC28A1     | 0.5083                  | 0                       | 0.0778                      | 0.99           | C                 |                       |
| rs2106673  | 15         | 89253599      | MAN2A2      | 0.775                   | 0.7333                  | 0.0111                      | 1              | CY                |                       |
| rs11073964 | 15         | 89344765      | VPS33B      | 0.7                     | 0.0167                  | 0                           | 1              | C                 |                       |
| rs3747579  | 16         | 4385328       | CORO7       | 0.7333                  | 0.05                    | 0.8333                      | 1              | CJ                |                       |
| rs749670   | 16         | 30996126      | ZNF646      | 0.375                   | 0                       | 0.9167                      | 1              | J                 |                       |
| rs7193955  | 16         | 46680083      | ABCC12      | 0.8167                  | 0.0667                  | 0.9222                      | 1              | CJ                |                       |
| rs17822931 | 16         | 46815699      | ABCC11      | 0.125                   | 0                       | 0.9333                      | 1              | J                 |                       |
| rs11860295 | 16         | 65873735      | PLEKHG4     | 0.075                   | 0.8                     | 0.0056                      | 1              | Y                 |                       |
| rs3868142  | 16         | 65877724      | PLEKHG4     | 0.075                   | 0.7833                  | 0.0056                      | 1              | Y                 |                       |
| rs8052655  | 16         | 65966681      | LRRC36      | 0.0417                  | 0.7083                  | 0.0056                      | 1              | Y                 |                       |
| rs3743599  | 16         | 74204077      | ADAT1       | 0.05                    | 0                       | 0.7611                      | 1              | J                 | **                    |
| rs3743598  | 16         | 74204186      | ADAT1       | 0.8167                  | 0.175                   | 0.1556                      | 1              | C                 | **                    |
| rs11640912 | 16         | 75917420      | ADAMTS18    | 0.6417                  | 0.8667                  | 0.1444                      | 1              | CY                |                       |
| rs12918952 | 16         | 76978276      | WVOX        | 0.6333                  | 0.0833                  | 0.0944                      | 1              | C                 |                       |
| rs16956174 | 16         | 80591113      | HSPC105     | 1                       | 0.3333                  | 0.9889                      | 1              | CJ                |                       |
| rs462769   | 16         | 88290764      | C16orf76    | 0.3667                  | 0.8083                  | 0.9833                      | 1              | YJ                |                       |
| rs7195066  | 16         | 88363824      | FANCA       | 0.7083                  | 0.0167                  | 0.0056                      | 1              | C                 |                       |
| rs7190823  | 16         | 88393544      | FANCA       | 0.5667                  | 0.15                    | 0.0111                      | 1              | C                 |                       |
| rs703903   | 17         | 3142253       | OR3A1       | 0.5583                  | 0.275                   | 1                           | 1              | CJ                |                       |
| rs224534   | 17         | 3433451       | TRPV1       | 0.2667                  | 0.0083                  | 0.8222                      | 1              | J                 |                       |

| SNP ID     | Chromosome | HG17 position | Gene          | CEU Derived Allele Freq | YRI Derived Allele Freq | JPT+CHB Derived Allele Freq | Fst percentile | Tested population | Long Haplotype Signal |
|------------|------------|---------------|---------------|-------------------------|-------------------------|-----------------------------|----------------|-------------------|-----------------------|
| rs9899177  | 17         | 4999532       | USP6          | 0.6667                  | 0.1667                  | 0.0944                      | 1              | C                 |                       |
| rs2189335  | 17         | 5266869       | RPAIN         | 0.1583                  | 0.1667                  | 0.7722                      | 1              | J                 |                       |
| rs2287499  | 17         | 7532893       | WDR79         | 0.8417                  | 0.0833                  | 0.7222                      | 1              | CJ                |                       |
| rs11649804 | 17         | 17637480      | RAI1          | 0.2583                  | 0.3083                  | 0.8556                      | 0.99           | J                 |                       |
| rs3818717  | 17         | 17647830      | RAI1          | 0.7083                  | 0.1333                  | 0.0556                      | 1              | C                 |                       |
| rs3183702  | 17         | 17688014      |               | 0.2667                  | 0.375                   | 0.9389                      | 1              | J                 |                       |
| rs7225888  | 17         | 26322430      | RNF135        | 0.9917                  | 0.175                   | 0.9944                      | 1              | CJ                |                       |
| rs6505228  | 17         | 26399303      |               | 0.9917                  | 0.1833                  | 1                           | 1              | CJ                |                       |
| rs1003645  | 17         | 31364397      | CCL23         | 0.1917                  | 0.9667                  | 0.4167                      | 0.99           | Y                 |                       |
| rs1058808  | 17         | 35137563      | ERBB2         | 0.7083                  | 0                       | 0.1667                      | 1              | C                 |                       |
| rs9891361  | 17         | 36913439      | KRT13         | 0.925                   | 0.2                     | 0.9222                      | 1              | CJ                |                       |
| rs2074158  | 17         | 37510689      | LGP2          | 0.1917                  | 0.85                    | 0.1389                      | 1              | Y                 |                       |
| rs9909488  | 17         | 40695542      |               | 0.975                   | 0.2583                  | 0.9944                      | 1              | CJ                |                       |
| rs550510   | 17         | 44281614      | CALCOCO2      | 0.15                    | 0                       | 0.7056                      | 1              | J                 |                       |
| rs3760413  | 17         | 45807775      | EME1          | 0.1                     | 0                       | 0.7444                      | 1              | J                 |                       |
| rs2643103  | 17         | 56141407      | BCAS3         | 1                       | 0.2083                  | 0.8722                      | 1              | CJ                | **                    |
| rs6504233  | 17         | 59918244      | POLG2         | 0.0167                  | 0.6667                  | 0                           | 1              | Y                 |                       |
| rs6504234  | 17         | 59918318      | POLG2         | 0.075                   | 0.8083                  | 0.0333                      | 1              | Y                 |                       |
| rs1427463  | 17         | 59923044      | POLG2         | 0.075                   | 0.8083                  | 0.0333                      | 1              | Y                 |                       |
| rs4581     | 17         | 61641219      | APOH          | 0.15                    | 0.6083                  | 0.7722                      | 1              | YJ                |                       |
| rs2056439  | 17         | 76893612      | C17orf55      | 0.7833                  | 0.075                   | 0.7222                      | 1              | CJ                |                       |
| rs4891392  | 18         | 65869668      | RTTN          | 0.05                    | 0.725                   | 0                           | 1              | Y                 |                       |
| rs3911730  | 18         | 66022323      | RTTN          | 0.8917                  | 0.0667                  | 1                           | 1              | CJ                |                       |
| rs687320   | 19         | 6024382       | RFX2          | 0.9917                  | 0.35                    | 1                           | 1              | CJ                |                       |
| rs2240227  | 19         | 15713242      | OR10H3        | 0.0583                  | 0                       | 0.6                         | 0.99           | J                 |                       |
| rs2608738  | 19         | 16760865      | LOC284434     | 0.9667                  | 0.375                   | 1                           | 0.99           | CJ                |                       |
| rs2302970  | 19         | 37790472      | ANKRD27       | 0.6417                  | 0.0167                  | 0.0778                      | 1              | C                 |                       |
| rs6510426  | 19         | 39727713      |               | 0.8583                  | 0.25                    | 0.9889                      | 1              | CJ                |                       |
| rs30461    | 19         | 44480955      | IL29          | 0.8833                  | 0.25                    | 0.9611                      | 1              | CJ                |                       |
| rs8110904  | 19         | 47723209      | CEACAM1       | 0.0083                  | 0.5667                  | 1                           | 1              | YJ                |                       |
| rs7260180  | 19         | 49720009      | CEACAM20      | 0.6583                  | 0.0833                  | 0.1722                      | 1              | C                 |                       |
| rs447802   | 19         | 53808171      | FAM83E        | 0.7667                  | 0.2                     | 0.2111                      | 1              | C                 |                       |
| rs601338   | 19         | 53898486      | FUT2          | 0.5417                  | 0.5417                  | 0.0111                      | 1              | CY                |                       |
| rs602662   | 19         | 53898797      | FUT2          | 0.6083                  | 0.5417                  | 0.0111                      | 1              | CY                |                       |
| rs1559155  | 19         | 54324584      | PPFIA3        | 0.2917                  | 0.0083                  | 0.8                         | 1              | J                 |                       |
| rs7246479  | 19         | 60516144      |               | 0.5                     | 0                       | 0.8222                      | 1              | J                 |                       |
| rs2076015  | 20         | 7911041       | TXNDC13       | 0.075                   | 0.6917                  | 0.55                        | 1              | YJ                |                       |
| rs947310   | 20         | 29912986      | DUSP15        | 0.6                     | 0.1833                  | 1                           | 1              | CJ                |                       |
| rs4911287  | 20         | 31090952      | BPIL3         | 0.6917                  | 0.0083                  | 0.2833                      | 1              | C                 |                       |
| rs2274934  | 20         | 60330882      | LAMA5         | 0.65                    | 0.05                    | 0.7889                      | 1              | CJ                |                       |
| rs3810548  | 20         | 60339273      | LAMA5         | 0.025                   | 0.6333                  | 0                           | 1              | Y                 |                       |
| rs2071152  | 21         | 44327549      | TMEM1         | 0                       | 0.7833                  | 0.0056                      | 1              | Y                 |                       |
| rs8131523  | 21         | 45666871      | L18A1, C21orf | 0.1083                  | 1                       | 0.15                        | 1              | Y                 |                       |
| rs2073748  | 22         | 18343525      | ARVCF         | 1                       | 0.375                   | 0.2222                      | 1              | C                 |                       |

| SNP ID    | Chromosome | HG17 position | Gene        | CEU Derived Allele Freq | YRI Derived Allele Freq | JPT+CHB Derived Allele Freq | Fst percentile | Tested population | Long Haplotype Signal |
|-----------|------------|---------------|-------------|-------------------------|-------------------------|-----------------------------|----------------|-------------------|-----------------------|
| rs2236005 | 22         | 24747534      | MYO18B      | 0.8417                  | 0.0667                  | 0.7389                      | 1              | CJ                |                       |
| rs743920  | 22         | 27945682      | EMID1       | 0.925                   | 0.1833                  | 0.4611                      | 1              | C                 |                       |
| rs1812240 | 22         | 41236604      | CGI-96      | 0.0333                  | 0.15                    | 0.7                         | 1              | J                 |                       |
| rs137055  | 22         | 41294530      | SERHL2      | 0.0583                  | 0.5667                  | 0.6611                      | 1              | YJ                |                       |
| rs138993  | 22         | 41934705      | SCUBE1      | 0.2417                  | 0.6417                  | 0.9278                      | 1              | YJ                |                       |
| rs7410764 | 22         | 44794719      |             | 0.6667                  | 0.0833                  | 0.8389                      | 0.99           | CJ                |                       |
| rs4044210 | 22         | 45106834      | CELSR1      | 0.225                   | 0.775                   | 0.0222                      | 0.99           | Y                 | **                    |
| rs6008794 | 22         | 45108213      | CELSR1      | 0.7833                  | 0.225                   | 0.9944                      | 1              | CJ                | **                    |
| rs910799  | 22         | 48599429      | ZBED4       | 0.1917                  | 0.875                   | 0.1722                      | 1              | Y                 |                       |
| rs1321    | 22         | 48618296      | ALG12       | 0.8                     | 0.125                   | 0.8278                      | 1              | CJ                |                       |
| rs8139422 | 22         | 48636224      | CRELD2      | 0.0167                  | 0.6917                  | 0.0556                      | 1              | Y                 |                       |
| rs8142477 | 22         | 49301520      | CPT1B, CHKE | 0.9333                  | 0.2583                  | 0.5222                      | 1              | CJ                |                       |
| rs3747295 | 23         | 17505901      | NHS         | 1                       | 0.0556                  | 0.5259                      | 1              | CJ                |                       |
| rs1385699 | 23         | 65608007      | EDA2R       | 0.7889                  | 0                       | 1                           | 0.99           | CJ                | **                    |
| rs1343879 | 23         | 74787550      | MAGEE2      | 0.0222                  | 0.0111                  | 0.9111                      | 1              | J                 |                       |
| rs3115758 | 23         | 128507399     | APLN        | 0.8889                  | 0.0778                  | 0.2593                      | 1              | C                 |                       |
| rs1059702 | 23         | 152805039     | IRAK1       | 0                       | 0.0111                  | 0.8074                      | 1              | J                 |                       |

**Table S11 Reported copy-number- variant regions (CNVs), in our top 22 candidates for selection (Methods).**

| Candidate Region<br>Chr:Position (MB,HG17) | CNV Start | CNV End   | CNV Length (kb) | Reference |
|--------------------------------------------|-----------|-----------|-----------------|-----------|
| chr2:108.7                                 | 108391709 | 108536212 | 145             | Locke     |
| chr2:108.7                                 | 107908395 | 108681855 | 773             | Redon     |
| chr2:136.1                                 | 137031522 | 137074036 | 43              | Redon     |
| chr4:33.9                                  | 34631676  | 34916911  | 285             | Sebat     |
| chr4:33.9                                  | 34599887  | 34749291  | 149             | Iafrate   |
| chr4:33.9                                  | 34599808  | 34652577  | 47              | McCarroll |
| chr4:33.9                                  | 33971807  | 34297097  | 325             | Redon     |
| chr4:33.9                                  | 34459337  | 34779109  | 320             | Redon     |
| chr4:33.9                                  | 34597970  | 34664260  | 66              | Conrad    |
| chr4:33.9                                  | 33183778  | 33220671  | 37              | Conrad    |
| chr4:159                                   | 159085344 | 159091948 | 7               | Conrad    |
| chr4:159                                   | 158907924 | 158955096 | 47              | Conrad    |
| chr10:22.7                                 | 2650802   | 3188773   | 538             | Redon     |
| chr12:78.3                                 | 78657407  | 78662732  | 5               | Tuzun     |
| chr15:46.4                                 | 46296330  | 46451070  | 155             | Redon     |
| chr16:74.3                                 | 73977115  | 74134472  | 157             | Redon     |
| chr16:74.3                                 | 74567282  | 74579010  | 12              | Redon     |
| chr19:43.5                                 | 44919744  | 45212970  | 293             | Redon     |
| chr22:32.5                                 | 32494349  | 32528033  | 34              | Redon     |
| chr23:63.5                                 | 63787842  | 63841340  | 47              | McCarroll |
| chr23:63.5                                 | 62130137  | 62294591  | 164             | Locke     |
| chr23:63.5                                 | 61984759  | 62329082  | 344             | Redon     |
| chr23:63.5                                 | 63292574  | 63919710  | 627             | Redon     |

Conrad, D. F. et al. A high-resolution survey of deletion polymorphism in the human genome. *Nat Genet* 38, 75-81 (2006)

Iafrate, A. J. et al. Detection of large-scale variation in the human genome. *Nat Genet* 36, 949-51 (2004).

Locke, D. P. et al. Linkage disequilibrium and heritability of copy-number polymorphisms within duplicated regions of the human genome. *Am J Hum Genet* 79, 275-90 (2006).

McCarroll, S. A. et al. Common deletion polymorphisms in the human genome. *Nat Genet* 38, 86-92 (2006).

Redon, R. et al. Global variation in copy number in the human genome. *Nature* 444, 444-54 (2006).

Sebat, J. et al. Large-scale copy number polymorphism in the human genome. *Science* 305, 525-8 (2004).

Tuzun, E. et al. Fine-scale structural variation of the human genome. *Nat Genet* 37, 727-32 (2005).
